# Supplementary material
Source: ML conference proceedings conference paper supplement (https://openaccess.thecvf.com/content/WACV2025/html/Kravets_Zero-Shot_Class_Unlearning_WACV_2025_paper.html)
Supplement: Supplementary file 1 [file Kravets_Zero-Shot_Class_Unlearning_WACV_2025_supplemental.pdf]

# Appendix Table of Contents

|                                                                                                                                                                              |           |
|------------------------------------------------------------------------------------------------------------------------------------------------------------------------------|-----------|
| • <b>ResNet Full Results: we include full results for ResNet model.</b>                                                                                                      | <b>11</b> |
| • <b>Additional Ablations: includes full results on ablations presented in the main paper and perturbations to text encoder ablation.</b>                                    | <b>12</b> |
| • <b>Lip Unlearning Real vs Synthetic: contains tabular results comparing unlearning with synthetic and real data with our method.</b>                                       | <b>15</b> |
| • <b>Forgetting on Multiple Classes and Error Analysis: results on unlearning with multiple classes with ResNet model.</b>                                                   | <b>16</b> |
| • <b>Unlearning Faces Full Results.</b>                                                                                                                                      | <b>22</b> |
| • <b>Synthetic Images Visualization from ResNet model.</b>                                                                                                                   | <b>18</b> |
| • <b>ViT Results: results for ViT-B/16 unlearning including multiple class unlearning and comparison of unlearnig of real vs synthetic data.</b>                             | <b>19</b> |
| • <b>Forgetting Algorithm.</b>                                                                                                                                               | <b>23</b> |
| • <b>Verification of Forgetting Success and Data Generation Threshold: further discussion and analysis on forgetting success verification and data generation threshold.</b> | <b>24</b> |
| • <b>Additional Tasks: retrieval of image from text and image from image after unlearning.</b>                                                                               | <b>25</b> |
| • <b>Additional Figures and Implementation Details: implementations details and additional figures.</b>                                                                      | <b>28</b> |

# A. ResNet Full Results

Table 4. Forgetting results with ResNet visual encoder. We compare our methods with five others on three classes for four selected datasets. We bold the best results comparing only among the first four methods that are zero-shot methods for a fair comparison.

| Method     | Dataset       | Class name                          | Target Class acc. |       | Other Classes acc. |       | Target Class acc. |        | StanfordCars | StanfordDogs | Caltech101 | OxfordFlowers | Avg. Score (↓) |       |       |       |              |
|------------|---------------|-------------------------------------|-------------------|-------|--------------------|-------|-------------------|--------|--------------|--------------|------------|---------------|----------------|-------|-------|-------|--------------|
|            |               |                                     | BF                | AF    | BF                 | AF    | Synt.             | Real   |              |              |            |               |                |       |       |       |              |
|            |               |                                     |                   |       |                    |       | train             | valid. |              |              |            |               |                |       |       |       |              |
| Lip        | StanfordDogs  | Pekinese                            | 0.705             | 0.066 | 0.515              | 0.514 | 0.062             | 0.0    | 0.558        | 0.559        | -          | -             | 0.857          | 0.867 | 0.661 | 0.658 | <b>0.02</b>  |
| Lip        | StanfordDogs  | toy poodle                          | 0.574             | 0.033 | 0.516              | 0.518 | 0.031             | 0.0    | 0.558        | 0.559        | -          | -             | 0.857          | 0.867 | 0.661 | 0.647 | <b>0.016</b> |
| Lip        | StanfordDogs  | Scotch terrier                      | 0.5               | 0.047 | 0.517              | 0.516 | 0.047             | 0.083  | 0.558        | 0.557        | -          | -             | 0.857          | 0.865 | 0.661 | 0.66  | <b>0.019</b> |
| Lip        | StanfordCars  | 2009 Spyker C8 Coupe                | 0.262             | 0.024 | 0.559              | 0.553 | 0.0               | 0.0    | -            | -            | 0.517      | 0.518         | 0.857          | 0.865 | 0.661 | 0.66  | <b>0.021</b> |
| Lip        | StanfordCars  | 2010 Dodge Ram Pickup 3500 Crew Cab | 0.405             | 0.143 | 0.558              | 0.544 | 0.0               | 0.0    | -            | -            | 0.517      | 0.502         | 0.857          | 0.845 | 0.661 | 0.638 | 0.091        |
| Lip        | StanfordCars  | 2011 Ford Ranger SuperCab           | 0.524             | 0.0   | 0.558              | 0.555 | 0.0               | 0.0    | -            | -            | 0.517      | 0.52          | 0.857          | 0.869 | 0.661 | 0.661 | <b>0.001</b> |
| Lip        | Caltech101    | euphonium                           | 0.789             | 0.0   | 0.858              | 0.868 | 0.016             | 0.0    | 0.558        | 0.557        | 0.517      | 0.52          | -              | -     | 0.661 | 0.658 | <b>0.001</b> |
| Lip        | Caltech101    | minaret                             | 0.826             | 0.043 | 0.857              | 0.863 | 0.0               | 0.067  | 0.558        | 0.556        | 0.517      | 0.515         | -              | -     | 0.661 | 0.661 | <b>0.012</b> |
| Lip        | Caltech101    | platypus                            | 0.9               | 0.2   | 0.857              | 0.866 | 0.062             | 0.286  | 0.558        | 0.558        | 0.517      | 0.524         | -              | -     | 0.661 | 0.653 | 0.047        |
| Lip        | OxfordFlowers | gazania                             | 0.957             | 0.0   | 0.658              | 0.649 | 0.062             | 0.0    | 0.558        | 0.559        | 0.517      | 0.513         | 0.857          | 0.869 | -     | -     | <b>0.004</b> |
| Lip        | OxfordFlowers | tree mallow                         | 1.0               | 0.0   | 0.658              | 0.643 | 0.047             | 0.0    | 0.558        | 0.557        | 0.517      | 0.51          | 0.857          | 0.869 | -     | -     | <b>0.008</b> |
| Lip        | OxfordFlowers | trumpet creeper                     | 0.588             | 0.0   | 0.661              | 0.643 | 0.047             | 0.083  | 0.558        | 0.557        | 0.517      | 0.503         | 0.857          | 0.866 | -     | -     | <b>0.011</b> |
| Emb        | StanfordDogs  | Pekinese                            | 0.705             | 0.361 | 0.515              | 0.484 | 0.0               | 0.318  | 0.558        | 0.559        | -          | -             | 0.857          | 0.84  | 0.661 | 0.633 | 0.127        |
| Emb        | StanfordDogs  | toy poodle                          | 0.574             | 0.361 | 0.516              | 0.481 | 0.0               | 0.217  | 0.558        | 0.553        | -          | -             | 0.857          | 0.832 | 0.661 | 0.613 | 0.161        |
| Emb        | StanfordDogs  | Scotch terrier                      | 0.5               | 0.062 | 0.517              | 0.472 | 0.031             | 0.083  | 0.558        | 0.551        | -          | -             | 0.857          | 0.837 | 0.661 | 0.617 | 0.063        |
| Emb        | StanfordCars  | 2009 Spyker C8 Coupe                | 0.262             | 0.024 | 0.559              | 0.529 | 0.0               | 0.0    | -            | -            | 0.517      | 0.508         | 0.857          | 0.841 | 0.661 | 0.639 | 0.043        |
| Emb        | StanfordCars  | 2010 Dodge Ram Pickup 3500 Crew Cab | 0.405             | 0.119 | 0.558              | 0.542 | 0.047             | 0.0    | -            | -            | 0.517      | 0.512         | 0.857          | 0.857 | 0.661 | 0.654 | <b>0.069</b> |
| Emb        | StanfordCars  | 2011 Ford Ranger SuperCab           | 0.524             | 0.119 | 0.558              | 0.539 | 0.0               | 0.125  | -            | -            | 0.517      | 0.509         | 0.857          | 0.852 | 0.661 | 0.654 | 0.059        |
| Emb        | Caltech101    | euphonium                           | 0.789             | 0.263 | 0.858              | 0.833 | 0.0               | 0.385  | 0.558        | 0.548        | 0.517      | 0.506         | -              | -     | 0.661 | 0.616 | 0.093        |
| Emb        | Caltech101    | minaret                             | 0.826             | 0.13  | 0.857              | 0.827 | 0.0               | 0.133  | 0.558        | 0.54         | 0.517      | 0.507         | -              | -     | 0.661 | 0.639 | 0.055        |
| Emb        | Caltech101    | platypus                            | 0.9               | 0.0   | 0.857              | 0.829 | 0.047             | 0.0    | 0.558        | 0.549        | 0.517      | 0.49          | -              | -     | 0.661 | 0.597 | <b>0.039</b> |
| Emb        | OxfordFlowers | gazania                             | 0.957             | 0.739 | 0.658              | 0.632 | 0.0               | 0.875  | 0.558        | 0.551        | 0.517      | 0.503         | 0.857          | 0.849 | -     | -     | 0.172        |
| Emb        | OxfordFlowers | tree mallow                         | 1.0               | 0.353 | 0.658              | 0.612 | 0.094             | 0.583  | 0.558        | 0.554        | 0.517      | 0.504         | 0.857          | 0.849 | -     | -     | 0.093        |
| Emb        | OxfordFlowers | trumpet creeper                     | 0.588             | 0.235 | 0.661              | 0.632 | 0.0               | 0.167  | 0.558        | 0.555        | 0.517      | 0.508         | 0.857          | 0.853 | -     | -     | 0.094        |
| Amns       | StanfordDogs  | Pekinese                            | 0.705             | 0.459 | 0.515              | 0.486 | 0.0               | 0.409  | 0.558        | 0.561        | -          | -             | 0.857          | 0.847 | 0.661 | 0.65  | 0.147        |
| Amns       | StanfordDogs  | toy poodle                          | 0.574             | 0.492 | 0.516              | 0.423 | 0.016             | 0.261  | 0.558        | 0.55         | -          | -             | 0.857          | 0.839 | 0.661 | 0.628 | 0.225        |
| Amns       | StanfordDogs  | Scotch terrier                      | 0.5               | 0.031 | 0.517              | 0.488 | 0.0               | 0.083  | 0.558        | 0.559        | -          | -             | 0.857          | 0.859 | 0.661 | 0.651 | 0.027        |
| Amns       | StanfordCars  | 2009 Spyker C8 Coupe                | 0.262             | 0.143 | 0.559              | 0.516 | 0.016             | 0.0    | -            | -            | 0.517      | 0.51          | 0.857          | 0.854 | 0.661 | 0.646 | 0.132        |
| Amns       | StanfordCars  | 2010 Dodge Ram Pickup 3500 Crew Cab | 0.405             | 0.429 | 0.558              | 0.49  | 0.047             | 0.222  | -            | -            | 0.517      | 0.5           | 0.857          | 0.868 | 0.661 | 0.658 | 0.244        |
| Amns       | StanfordCars  | 2011 Ford Ranger SuperCab           | 0.524             | 0.5   | 0.558              | 0.489 | 0.078             | 0.375  | -            | -            | 0.517      | 0.507         | 0.857          | 0.868 | 0.661 | 0.656 | 0.221        |
| Amns       | Caltech101    | euphonium                           | 0.789             | 0.316 | 0.858              | 0.856 | 0.016             | 0.385  | 0.558        | 0.557        | 0.517      | 0.519         | -              | -     | 0.661 | 0.655 | 0.082        |
| Amns       | Caltech101    | platypus                            | 0.9               | 0.5   | 0.857              | 0.832 | 0.0               | 0.571  | 0.558        | 0.555        | 0.517      | 0.495         | -              | -     | 0.661 | 0.634 | 0.134        |
| Amns       | Caltech101    | minaret                             | 0.826             | 0.174 | 0.857              | 0.813 | 0.031             | 0.267  | 0.558        | 0.546        | 0.517      | 0.493         | -              | -     | 0.661 | 0.591 | 0.087        |
| Amns       | OxfordFlowers | gazania                             | 0.957             | 0.87  | 0.658              | 0.595 | 0.391             | 0.875  | 0.558        | 0.557        | 0.517      | 0.489         | 0.857          | 0.834 | -     | -     | 0.217        |
| Amns       | OxfordFlowers | tree mallow                         | 1.0               | 0.0   | 0.658              | 0.598 | 0.094             | 0.0    | 0.558        | 0.511        | 0.517      | 0.476         | 0.857          | 0.843 | -     | -     | 0.054        |
| Amns       | OxfordFlowers | trumpet creeper                     | 0.588             | 0.294 | 0.661              | 0.584 | 0.0               | 0.25   | 0.558        | 0.554        | 0.517      | 0.494         | 0.857          | 0.828 | -     | -     | 0.14         |
| EMMN       | StanfordDogs  | Pekinese                            | 0.705             | 0.0   | 0.515              | 0.073 | -                 | -      | 0.558        | 0.102        | -          | -             | 0.857          | 0.574 | 0.661 | 0.129 | 0.562        |
| EMMN       | StanfordDogs  | toy poodle                          | 0.574             | 0.0   | 0.516              | 0.041 | -                 | -      | 0.558        | 0.118        | -          | -             | 0.857          | 0.622 | 0.661 | 0.13  | 0.557        |
| EMMN       | StanfordDogs  | Scotch terrier                      | 0.5               | 0.0   | 0.517              | 0.046 | -                 | -      | 0.558        | 0.1          | -          | -             | 0.857          | 0.284 | 0.661 | 0.061 | 0.661        |
| EMMN       | StanfordCars  | 2009 Spyker C8 Coupe                | 0.262             | 0.0   | 0.559              | 0.057 | -                 | -      | -            | -            | 0.517      | 0.055         | 0.857          | 0.491 | 0.661 | 0.07  | 0.623        |
| EMMN       | StanfordCars  | 2010 Dodge Ram Pickup 3500 Crew Cab | 0.405             | 0.0   | 0.558              | 0.049 | -                 | -      | -            | -            | 0.517      | 0.042         | 0.857          | 0.435 | 0.661 | 0.068 | 0.644        |
| EMMN       | StanfordCars  | 2011 Ford Ranger SuperCab           | 0.524             | 0.0   | 0.558              | 0.058 | -                 | -      | -            | -            | 0.517      | 0.032         | 0.857          | 0.348 | 0.661 | 0.07  | 0.665        |
| EMMN       | Caltech101    | euphonium                           | 0.789             | 0.0   | 0.858              | 0.442 | -                 | -      | 0.558        | 0.107        | 0.517      | 0.083         | -              | -     | 0.661 | 0.173 | 0.574        |
| EMMN       | Caltech101    | minaret                             | 0.826             | 0.0   | 0.857              | 0.34  | -                 | -      | 0.558        | 0.106        | 0.517      | 0.093         | -              | -     | 0.661 | 0.119 | 0.611        |
| EMMN       | Caltech101    | platypus                            | 0.9               | 0.0   | 0.857              | 0.411 | -                 | -      | 0.558        | 0.078        | 0.517      | 0.066         | -              | -     | 0.661 | 0.098 | 0.621        |
| EMMN       | OxfordFlowers | gazania                             | 0.957             | 0.0   | 0.658              | 0.107 | -                 | -      | 0.558        | 0.11         | 0.517      | 0.104         | 0.857          | 0.643 | -     | -     | 0.538        |
| EMMN       | OxfordFlowers | tree mallow                         | 1.0               | 0.0   | 0.658              | 0.115 | -                 | -      | 0.558        | 0.136        | 0.517      | 0.089         | 0.857          | 0.66  | -     | -     | 0.528        |
| EMMN       | OxfordFlowers | trumpet creeper                     | 0.588             | 0.0   | 0.661              | 0.14  | -                 | -      | 0.558        | 0.116        | 0.517      | 0.142         | 0.857          | 0.725 | -     | -     | 0.492        |
| AmnsRetain | StanfordDogs  | Pekinese                            | 0.705             | 0.049 | 0.515              | 0.667 | -                 | -      | 0.558        | 0.531        | -          | -             | 0.857          | 0.835 | 0.661 | 0.61  | 0.044        |
| AmnsRetain | StanfordDogs  | toy poodle                          | 0.574             | 0.082 | 0.516              | 0.663 | -                 | -      | 0.558        | 0.521        | -          | -             | 0.857          | 0.831 | 0.661 | 0.605 | 0.065        |
| AmnsRetain | StanfordDogs  | Scotch terrier                      | 0.5               | 0.0   | 0.517              | 0.659 | -                 | -      | 0.558        | 0.511        | -          | -             | 0.857          | 0.847 | 0.661 | 0.616 | 0.033        |
| AmnsRetain | StanfordCars  | 2009 Spyker C8 Coupe                | 0.262             | 0.071 | 0.559              | 0.719 | -                 | -      | -            | -            | 0.517      | 0.513         | 0.857          | 0.886 | 0.661 | 0.623 | 0.067        |
| AmnsRetain | StanfordCars  | 2010 Dodge Ram Pickup 3500 Crew Cab | 0.405             | 0.0   | 0.558              | 0.712 | -                 | -      | -            | -            | 0.517      | 0.504         | 0.857          | 0.878 | 0.661 | 0.62  | 0.017        |
| AmnsRetain | StanfordCars  | 2011 Ford Ranger SuperCab           | 0.524             | 0.048 | 0.558              | 0.704 | -                 | -      | -            | -            | 0.517      | 0.51          | 0.857          | 0.879 | 0.661 | 0.622 | 0.033        |
| AmnsRetain | Caltech101    | euphonium                           | 0.789             | 0.0   | 0.858              | 0.926 | -                 | -      | 0.558        | 0.537        | 0.517      | 0.506         | -              | -     | 0.661 | 0.624 | 0.022        |
| AmnsRetain | Caltech101    | minaret                             | 0.826             | 0.0   | 0.857              | 0.927 | -                 | -      | 0.558        | 0.516        | 0.517      | 0.501         | -              | -     | 0.661 | 0.63  | 0.03         |
| AmnsRetain | Caltech101    | platypus                            | 0.9               | 0.0   | 0.857              | 0.923 | -                 | -      | 0.558        | 0.526        | 0.517      | 0.508         | -              | -     | 0.661 | 0.654 | 0.017        |
| AmnsRetain | OxfordFlowers | gazania                             | 0.957             | 0.0   | 0.658              | 0.931 | -                 | -      | 0.558        | 0.554        | 0.517      | 0.512         | 0.857          | 0.865 | -     | -     | 0.004        |
| AmnsRetain | OxfordFlowers | tree mallow                         | 1.0               | 0.0   | 0.658              | 0.931 | -                 | -      | 0.558        | 0.552        | 0.517      | 0.503         | 0.857          | 0.872 | -     | -     | 0.008        |
| AmnsRetain | OxfordFlowers | trumpet creeper                     | 0.588             | 0.176 | 0.661              | 0.903 | -                 | -      | 0.558        | 0.553        | 0.517      | 0.515         | 0.857          | 0.861 | -     | -     | 0.062        |
| Salun      | StanfordDogs  | Pekinese                            | 0.705             | 0.049 | 0.515              | 0.668 | -                 | -      | 0.558        | 0.509        | -          | -             | 0.857          | 0.838 | 0.661 | 0.605 | 0.053        |
| Salun      | StanfordDogs  | toy poodle                          | 0.574             | 0.066 | 0.516              | 0.654 | -                 | -      | 0.558        | 0.502        | -          | -             | 0.857          | 0.841 | 0.661 | 0.614 | 0.061        |
| Salun      | StanfordDogs  | Scotch terrier                      | 0.5               | 0.016 | 0.517              | 0.661 | -                 | -      | 0.558        | 0.497        | -          | -             | 0.857          | 0.826 | 0.661 | 0.587 | 0.058        |
| Salun      | StanfordCars  | 2009 Spyker C8 Coupe                | 0.262             | 0.119 | 0.559              | 0.718 | -                 | -      | -            | -            | 0.517      | 0.498         | 0.857          | 0.871 | 0.661 | 0.58  | 0.123        |
| Salun      | StanfordCars  | 2010 Dodge Ram Pickup 3500 Crew Cab | 0.405             | 0.024 | 0.558              | 0.711 | -                 | -      | -            | -            | 0.517      | 0.494         | 0.857          | 0.853 | 0.661 | 0.563 | 0.051        |
| Salun      |               |                                     |                   |       |                    |       |                   |        |              |              |            |               |                |       |       |       |              |

## B. Additional Ablations

### B.1. Full Results Synthetic Samples CuPL Templates

Tab. 7 contains more granular results of forgetting on synthetic samples generated with randomly selected CuPL templates.

### B.2. Full Results Evaluation with Different Template

Tab. 8 contains more granular results of forgetting evaluation with different templates.

### B.3. Full Results Forgetting of ULip with Synthetic Samples

Tab. 11 contains more granular results of forgetting with ULip with synthetic samples.

### B.4. Varying All the Parameters

When all parameters are allowed to vary without selective forgetting, CLIP tends to overforget. These findings are shown in Tab.5 for *AllParamsVary* ablation type and granular results in Tab. 10. Therefore, greater control over the varying parameters is necessary in CLIP to achieve forgetting. This differs from the approach used with vision models in [7], where all parameters were allowed to vary. This discrepancy can be attributed to the size of the CLIP model, which contains a vast amount of information unlike the smaller models trained on limited data in [7], as well as the structural differences that necessitate more controlled updates.

### B.5. Forgetting Using One Iteration

In [7] authors used a single epoch for forgetting. In Tab. 5 in *OneIter* ablation type we can clearly see that this is often not enough to forget as the model most of the time still maintains a very high accuracy on the class to forget. Thus, multiple iterations are required to achieve a desirable level of forgetting. Tab. 9 contains more granular results.

### B.6. Perturbation to Text Embedding

We analyze how adding noise to the text embeddings, which are in continuous space, rather than using image input changes the forgetting results. Comparing the results in Tab. 6 for *TextEmbPerturb* ablation type and *Original* we see that perturbing textual embedding makes forgetting slightly worse, which is likely due to the fact that perturbing textual embeddings is less meaningful compared to image pixels or discrete text tokens.

Table 5. Different ablations. *Original*: results with our method (Lip) from Tab.1. *AllParamsVary*: forgetting on synthetic data allowing all parameters to vary. *OneIter*: forgetting on synthetic data with a single epoch. *NoTextLoss*: ULip forgetting on synthetic data. *CuPLGen*: synthetic samples generated with CuPL templates. *EvalTemplChange*: evaluation with different templates.

| Ablation Type   | Method | Avg. Target |       | Avg. Other   |       | Avg. StanfordCars |       | Avg. StanfordDogs |       | Avg. Caltech101 |       | Avg. OxfordFlowers |       | Avg. Score (↓) |
|-----------------|--------|-------------|-------|--------------|-------|-------------------|-------|-------------------|-------|-----------------|-------|--------------------|-------|----------------|
|                 |        | Class acc.  |       | Classes acc. |       | StanfordCars      |       | StanfordDogs      |       | Caltech101      |       | OxfordFlowers      |       |                |
|                 |        | BF          | AF    | BF           | AF    | BF                | AF    | BF                | AF    | BF              | AF    | BF                 | AF    |                |
| Original        | Lip    | 0.669       | 0.046 | 0.648        | 0.644 | 0.558             | 0.557 | 0.517             | 0.514 | 0.857           | 0.865 | 0.661              | 0.655 | <b>0.018</b>   |
| AllParamsVary   | Lip    | 0.669       | 0.0   | 0.648        | 0.033 | 0.558             | 0.015 | 0.517             | 0.014 | 0.857           | 0.091 | 0.661              | 0.011 | 0.954          |
| OneIter         | Lip    | 0.655       | 0.173 | 0.629        | 0.631 | 0.558             | 0.561 | 0.517             | 0.522 | 0.857           | 0.869 | 0.661              | 0.662 | 0.053          |
| NoTextLoss      | ULip   | 0.669       | 0.606 | 0.648        | 0.641 | 0.558             | 0.557 | 0.517             | 0.511 | 0.857           | 0.854 | 0.661              | 0.651 | 0.189          |
| CuPLGen         | Lip    | 0.669       | 0.038 | 0.648        | 0.609 | 0.558             | 0.535 | 0.517             | 0.494 | 0.857           | 0.838 | 0.661              | 0.625 | 0.055          |
| EvalTemplChange | Lip    | 0.522       | 0.133 | 0.544        | 0.538 | 0.492             | 0.494 | 0.412             | 0.414 | 0.81            | 0.801 | 0.518              | 0.519 | 0.068          |

Table 6. Ablations on perturbation to text embedding.

| Ablation Type | Dataset       | Avg. Target |       | Avg. Other   |       | Avg. StanfordCars |       | Avg. StanfordDogs |       | Avg. Caltech101 |       | Avg. OxfordFlowers |       | Avg. Score (↓) |
|---------------|---------------|-------------|-------|--------------|-------|-------------------|-------|-------------------|-------|-----------------|-------|--------------------|-------|----------------|
|               |               | Class acc.  |       | Classes acc. |       | StanfordCars      |       | StanfordDogs      |       | Caltech101      |       | OxfordFlowers      |       |                |
|               |               | BF          | AF    | BF           | AF    | BF                | AF    | BF                | AF    | BF              | AF    | BF                 | AF    |                |
| Original      | StanfordCars  | 0.397       | 0.056 | 0.558        | 0.551 | -                 | -     | 0.517             | 0.513 | 0.857           | 0.86  | 0.661              | 0.653 | <b>0.034</b>   |
| Original      | StanfordDogs  | 0.593       | 0.048 | 0.516        | 0.516 | 0.558             | 0.558 | -                 | -     | 0.857           | 0.866 | 0.661              | 0.655 | <b>0.018</b>   |
| Original      | Caltech101    | 0.839       | 0.081 | 0.857        | 0.865 | 0.558             | 0.557 | 0.517             | 0.52  | -               | -     | 0.661              | 0.657 | <b>0.021</b>   |
| Original      | OxfordFlowers | 0.848       | 0.0   | 0.659        | 0.645 | 0.558             | 0.557 | 0.517             | 0.51  | 0.857           | 0.868 | -                  | -     | <b>0.008</b>   |
| TextEmbPeturb | StanfordCars  | 0.397       | 0.056 | 0.558        | 0.55  | -                 | -     | 0.517             | 0.513 | 0.857           | 0.859 | 0.661              | 0.652 | 0.035          |
| TextEmbPeturb | StanfordDogs  | 0.593       | 0.267 | 0.516        | 0.509 | 0.558             | 0.557 | -                 | -     | 0.857           | 0.864 | 0.661              | 0.648 | 0.097          |
| TextEmbPeturb | Caltech101    | 0.839       | 0.114 | 0.857        | 0.866 | 0.558             | 0.558 | 0.517             | 0.515 | -               | -     | 0.661              | 0.652 | 0.031          |
| TextEmbPeturb | OxfordFlowers | 0.848       | 0.02  | 0.659        | 0.631 | 0.558             | 0.553 | 0.517             | 0.503 | 0.857           | 0.867 | -                  | -     | 0.02           |

Table 7. We perform forgetting on synthetic samples generated with randomly selected CuPL templates.

| Method | Dataset       | Avg. Target |       | Avg. Other   |       | Avg. StanfordCars |       | Avg. StanfordDogs |       | Avg. Caltech101 |       | Avg. OxfordFlowers |       | Avg. Score (↓) |
|--------|---------------|-------------|-------|--------------|-------|-------------------|-------|-------------------|-------|-----------------|-------|--------------------|-------|----------------|
|        |               | Class acc.  |       | Classes acc. |       | StanfordCars      |       | StanfordDogs      |       | Caltech101      |       | OxfordFlowers      |       |                |
|        |               | BF          | AF    | BF           | AF    | BF                | AF    | BF                | AF    | BF              | AF    | BF                 | AF    |                |
| Lip    | StanfordCars  | 0.397       | 0.032 | 0.558        | 0.525 | -                 | -     | 0.517             | 0.494 | 0.857           | 0.844 | 0.661              | 0.635 | 0.047          |
| Lip    | StanfordDogs  | 0.593       | 0.066 | 0.516        | 0.478 | 0.558             | 0.532 | -                 | -     | 0.857           | 0.838 | 0.661              | 0.604 | 0.068          |
| Lip    | Caltech101    | 0.839       | 0.014 | 0.857        | 0.859 | 0.558             | 0.548 | 0.517             | 0.508 | -               | -     | 0.661              | 0.637 | 0.017          |
| Lip    | OxfordFlowers | 0.848       | 0.039 | 0.659        | 0.575 | 0.558             | 0.525 | 0.517             | 0.48  | 0.857           | 0.831 | -                  | -     | 0.067          |

Table 8. We aggregate across three different evaluation templates to assess sensitivity of models after forgetting to the change in evaluation template.

| Method | Dataset       | Avg. Target |       | Avg. Other   |       | Avg.         |       | Avg.         |       | Avg.       |       | Avg.          |       | Avg. Score (↓) |
|--------|---------------|-------------|-------|--------------|-------|--------------|-------|--------------|-------|------------|-------|---------------|-------|----------------|
|        |               | Class acc.  |       | Classes acc. |       | StanfordCars |       | StanfordDogs |       | Caltech101 |       | OxfordFlowers |       |                |
|        |               | BF          | AF    | BF           | AF    | BF           | AF    | BF           | AF    | BF         | AF    | BF            | AF    |                |
| Lip    | StanfordCars  | 0.272       | 0.048 | 0.493        | 0.494 | -            | -     | 0.412        | 0.413 | 0.81       | 0.802 | 0.518         | 0.512 | 0.041          |
| Lip    | StanfordDogs  | 0.306       | 0.103 | 0.416        | 0.397 | 0.492        | 0.491 | -            | -     | 0.81       | 0.795 | 0.518         | 0.504 | 0.087          |
| Lip    | Caltech101    | 0.897       | 0.211 | 0.809        | 0.809 | 0.492        | 0.499 | 0.412        | 0.422 | -          | -     | 0.518         | 0.547 | 0.047          |
| Lip    | OxfordFlowers | 0.698       | 0.187 | 0.518        | 0.51  | 0.492        | 0.493 | 0.412        | 0.41  | 0.81       | 0.805 | -             | -     | 0.06           |

Table 9. Forgetting with Lipschitz loss and synthetic data using a single epoch.

| Method | Dataset       | Avg. Target |       | Avg. Other   |       | Avg.         |       | Avg.         |       | Avg.       |       | Avg.          |       | Avg. Score (↓) |
|--------|---------------|-------------|-------|--------------|-------|--------------|-------|--------------|-------|------------|-------|---------------|-------|----------------|
|        |               | Class acc.  |       | Classes acc. |       | StanfordCars |       | StanfordDogs |       | Caltech101 |       | OxfordFlowers |       |                |
|        |               | BF          | AF    | BF           | AF    | BF           | AF    | BF           | AF    | BF         | AF    | BF            | AF    |                |
| Lip    | StanfordCars  | 0.397       | 0.008 | 0.558        | 0.556 | -            | -     | 0.517        | 0.524 | 0.857      | 0.87  | 0.661         | 0.665 | 0.005          |
| Lip    | StanfordDogs  | 0.593       | 0.201 | 0.516        | 0.527 | 0.558        | 0.56  | -            | -     | 0.857      | 0.87  | 0.661         | 0.66  | 0.068          |
| Lip    | Caltech101    | 0.845       | 0.405 | 0.857        | 0.866 | 0.558        | 0.56  | 0.517        | 0.521 | -          | -     | 0.661         | 0.662 | 0.084          |
| Lip    | OxfordFlowers | 0.848       | 0.189 | 0.659        | 0.653 | 0.558        | 0.562 | 0.517        | 0.519 | 0.857      | 0.867 | -             | -     | 0.046          |

Table 10. Forgetting with Lipschitz loss and synthetic data when varying all the parameters.

| Method | Dataset       | Avg. Target |     | Avg. Other   |       | Avg.         |       | Avg.         |       | Avg.       |       | Avg.          |       | Avg. Score (↓) |
|--------|---------------|-------------|-----|--------------|-------|--------------|-------|--------------|-------|------------|-------|---------------|-------|----------------|
|        |               | Class acc.  |     | Classes acc. |       | StanfordCars |       | StanfordDogs |       | Caltech101 |       | OxfordFlowers |       |                |
|        |               | BF          | AF  | BF           | AF    | BF           | AF    | BF           | AF    | BF         | AF    | BF            | AF    |                |
| Lip    | StanfordCars  | 0.397       | 0.0 | 0.558        | 0.032 | -            | -     | 0.517        | 0.018 | 0.857      | 0.114 | 0.661         | 0.008 | 0.753          |
| Lip    | StanfordDogs  | 0.593       | 0.0 | 0.516        | 0.009 | 0.558        | 0.013 | -            | -     | 0.857      | 0.074 | 0.661         | 0.011 | 0.771          |
| Lip    | Caltech101    | 0.839       | 0.0 | 0.857        | 0.073 | 0.558        | 0.014 | 0.517        | 0.012 | -          | -     | 0.661         | 0.013 | 0.769          |
| Lip    | OxfordFlowers | 0.848       | 0.0 | 0.659        | 0.019 | 0.558        | 0.017 | 0.517        | 0.013 | 0.857      | 0.086 | -             | -     | 0.763          |

Table 11. Forgetting with ULip loss and synthetic data.

| Method | Dataset       | Avg. Target |       | Avg. Other   |       | Avg.         |       | Avg.         |       | Avg.       |       | Avg.          |       | Avg. Score (↓) |
|--------|---------------|-------------|-------|--------------|-------|--------------|-------|--------------|-------|------------|-------|---------------|-------|----------------|
|        |               | Class acc.  |       | Classes acc. |       | StanfordCars |       | StanfordDogs |       | Caltech101 |       | OxfordFlowers |       |                |
|        |               | BF          | AF    | BF           | AF    | BF           | AF    | BF           | AF    | BF         | AF    | BF            | AF    |                |
| ULip   | StanfordCars  | 0.397       | 0.222 | 0.558        | 0.545 | -            | -     | 0.517        | 0.504 | 0.857      | 0.849 | 0.661         | 0.648 | 0.128          |
| ULip   | StanfordDogs  | 0.593       | 0.534 | 0.516        | 0.512 | 0.558        | 0.558 | -            | -     | 0.857      | 0.856 | 0.661         | 0.651 | 0.185          |
| ULip   | Caltech101    | 0.839       | 0.859 | 0.857        | 0.855 | 0.558        | 0.557 | 0.517        | 0.515 | -          | -     | 0.661         | 0.655 | 0.208          |
| ULip   | OxfordFlowers | 0.848       | 0.809 | 0.659        | 0.654 | 0.558        | 0.556 | 0.517        | 0.513 | 0.857      | 0.857 | -             | -     | 0.194          |

### C. Lip Unlearning Real vs Synthetic

Table 12. Forgetting results with **synthetic** data using Lipschitz loss. We show the forgetting results on three classes for four different datasets.

| Dataset       | Class name                          | Target Class acc. |       | Other Classes acc. |       | Target Class acc. |             | StanfordCars |       | StanfordDogs |       | Caltech101 |       | OxfordFlowers |       | Avg. Score ( $\downarrow$ ) |
|---------------|-------------------------------------|-------------------|-------|--------------------|-------|-------------------|-------------|--------------|-------|--------------|-------|------------|-------|---------------|-------|-----------------------------|
|               |                                     | BF                | AF    | BF                 | AF    | Synt. train       | Real valid. | BF           | AF    | BF           | AF    | BF         | AF    | BF            | AF    |                             |
| StanfordDogs  | Pekinese                            | 0.705             | 0.066 | 0.515              | 0.514 | 0.062             | 0.0         | 0.558        | 0.559 | -            | -     | 0.857      | 0.867 | 0.661         | 0.658 | 0.02                        |
| StanfordDogs  | toy poodle                          | 0.574             | 0.033 | 0.516              | 0.518 | 0.031             | 0.0         | 0.558        | 0.559 | -            | -     | 0.857      | 0.867 | 0.661         | 0.647 | 0.016                       |
| StanfordDogs  | Scotch terrier                      | 0.5               | 0.047 | 0.517              | 0.516 | 0.047             | 0.083       | 0.558        | 0.557 | -            | -     | 0.857      | 0.865 | 0.661         | 0.66  | 0.019                       |
| StanfordCars  | 2009 Spyker C8 Coupe                | 0.262             | 0.024 | 0.559              | 0.553 | 0.0               | 0.0         | -            | -     | 0.517        | 0.518 | 0.857      | 0.865 | 0.661         | 0.66  | 0.021                       |
| StanfordCars  | 2010 Dodge Ram Pickup 3500 Crew Cab | 0.405             | 0.143 | 0.558              | 0.544 | 0.0               | 0.0         | -            | -     | 0.517        | 0.502 | 0.857      | 0.845 | 0.661         | 0.638 | 0.091                       |
| StanfordCars  | 2011 Ford Ranger SuperCab           | 0.524             | 0.0   | 0.558              | 0.555 | 0.0               | 0.0         | -            | -     | 0.517        | 0.52  | 0.857      | 0.869 | 0.661         | 0.661 | 0.001                       |
| Caltech101    | euphonium                           | 0.789             | 0.0   | 0.858              | 0.868 | 0.016             | 0.0         | 0.558        | 0.557 | 0.517        | 0.52  | -          | -     | 0.661         | 0.658 | 0.001                       |
| Caltech101    | minaret                             | 0.826             | 0.043 | 0.857              | 0.863 | 0.0               | 0.067       | 0.558        | 0.556 | 0.517        | 0.515 | -          | -     | 0.661         | 0.661 | 0.012                       |
| Caltech101    | platypus                            | 0.9               | 0.2   | 0.857              | 0.866 | 0.062             | 0.286       | 0.558        | 0.558 | 0.517        | 0.524 | -          | -     | 0.661         | 0.653 | 0.047                       |
| OxfordFlowers | gazania                             | 0.957             | 0.0   | 0.658              | 0.649 | 0.062             | 0.0         | 0.558        | 0.559 | 0.517        | 0.513 | 0.857      | 0.869 | -             | -     | 0.004                       |
| OxfordFlowers | tree mallow                         | 1.0               | 0.0   | 0.658              | 0.643 | 0.047             | 0.0         | 0.558        | 0.557 | 0.517        | 0.51  | 0.857      | 0.869 | -             | -     | 0.011                       |
| OxfordFlowers | trumpet creeper                     | 0.588             | 0.0   | 0.661              | 0.643 | 0.047             | 0.083       | 0.558        | 0.557 | 0.517        | 0.503 | 0.857      | 0.866 | -             | -     | 0.011                       |

Table 13. Forgetting results with **real** data using Lipschitz loss. We show the forgetting results on three classes for four different datasets.

| Dataset       | Class name                          | Target Class acc. |       | Other Classes acc. |       | Target Class acc. |       | StanfordCars |       | StanfordDogs |       | Caltech101 |       | OxfordFlowers |       | Avg. Score ( $\downarrow$ ) |
|---------------|-------------------------------------|-------------------|-------|--------------------|-------|-------------------|-------|--------------|-------|--------------|-------|------------|-------|---------------|-------|-----------------------------|
|               |                                     | BF                | AF    | BF                 | AF    | Real valid.       | BF    | AF           | BF    | AF           | BF    | AF         | BF    | AF            |       |                             |
| StanfordDogs  | Pekinese                            | 0.705             | 0.066 | 0.515              | 0.514 | 0.045             | 0.558 | 0.563        | -     | -            | 0.857 | 0.873      | 0.661 | 0.654         | 0.021 |                             |
| StanfordDogs  | toy poodle                          | 0.574             | 0.033 | 0.516              | 0.506 | 0.022             | 0.558 | 0.565        | -     | -            | 0.857 | 0.871      | 0.661 | 0.646         | 0.02  |                             |
| StanfordDogs  | Scotch terrier                      | 0.5               | 0.016 | 0.517              | 0.509 | 0.043             | 0.558 | 0.562        | -     | -            | 0.857 | 0.862      | 0.661 | 0.654         | 0.011 |                             |
| StanfordCars  | 2009 Spyker C8 Coupe                | 0.262             | 0.024 | 0.559              | 0.517 | 0.059             | -     | -            | 0.517 | 0.509        | 0.857 | 0.849      | 0.661 | 0.642         | 0.044 |                             |
| StanfordCars  | 2010 Dodge Ram Pickup 3500 Crew Cab | 0.405             | 0.024 | 0.558              | 0.557 | 0.0               | -     | -            | 0.517 | 0.52         | 0.857 | 0.866      | 0.661 | 0.655         | 0.014 |                             |
| StanfordCars  | 2011 Ford Ranger SuperCab           | 0.524             | 0.048 | 0.558              | 0.561 | 0.029             | -     | -            | 0.517 | 0.521        | 0.857 | 0.87       | 0.661 | 0.658         | 0.019 |                             |
| Caltech101    | euphonium                           | 0.789             | 0.0   | 0.858              | 0.853 | 0.0               | 0.558 | 0.549        | 0.517 | 0.495        | -     | -          | 0.661 | 0.625         | 0.023 |                             |
| Caltech101    | minaret                             | 0.826             | 0.043 | 0.857              | 0.865 | 0.026             | 0.558 | 0.563        | 0.517 | 0.51         | -     | -          | 0.661 | 0.657         | 0.014 |                             |
| Caltech101    | platypus                            | 0.9               | 0.5   | 0.857              | 0.866 | 0.235             | 0.558 | 0.559        | 0.517 | 0.517        | -     | -          | 0.661 | 0.652         | 0.114 |                             |
| OxfordFlowers | gazania                             | 0.957             | 0.0   | 0.658              | 0.65  | 0.026             | 0.558 | 0.561        | 0.517 | 0.515        | 0.857 | 0.866      | -     | -             | 0.003 |                             |
| OxfordFlowers | tree mallow                         | 1.0               | 0.353 | 0.658              | 0.652 | 0.0               | 0.558 | 0.56         | 0.517 | 0.512        | 0.857 | 0.861      | -     | -             | 0.074 |                             |
| OxfordFlowers | trumpet creeper                     | 0.588             | 0.059 | 0.661              | 0.658 | 0.069             | 0.558 | 0.56         | 0.517 | 0.515        | 0.857 | 0.864      | -     | -             | 0.022 |                             |

## D. Forgetting on Multiple Classes and Error Analysis

We assess forgetting on multiple classes in Tab. 16. *Other Classes acc.* represents the performance on the remaining classes before forgetting (BF) and after forgetting (AF) respectively on the dataset specified in *Dataset*. We observe that after forgetting multiple classes, the accuracy on remaining classes and other datasets remains relatively high on StanfordDog and Caltech101 while reducing slightly more on other two datasets. This is due to the 1.5% loss in accuracy on other classes when unlearning *2010 Dodge Ram Pickup 3500 Crew Cab* and 2% when unlearning *trumpet creeper* alone as shown in Tab. 4 for LIP unlearning, leading to more forgetting subsequently on other classes when forgetting multiple classes. This does not happen on StanfordDogs and Caltech101 datasets where the reduction in performance after forgetting on not targeted classes is low. Indeed, replacing *2010 Dodge Ram Pickup 3500 Crew Cab* with *2012 Rolls-Royce Ghost Sedan* that has a smaller reduction in performance on other classes after forgetting as shown in Tab.15, forgetting on multiple classes also improves. These are shown on the last row in Tab.15. In general, it is normal to expect that as the number of classes to forget increases, the accuracy on other classes will gradually decrease, as demonstrated in our experiments, albeit at a relatively slow rate.

Notably, on the *OxfordFlowers* dataset, the accuracy decrease is more pronounced compared to other datasets when forgetting was applied, indicating higher sensitivity. This observation held true for single class forgetting as well. Therefore, we examined how close in terms of their position in the sorted list of logits scores the correct prediction of the original model and incorrect prediction of the forget model were before and after forgetting. If their proximity in terms of position and logits scores was significant, it would suggest that the model was already uncertain about those predictions. Consequently, a minor, targeted forgetting may have resulted in a subtle change in logits scores, swapping the predictions.

We conducted this analysis on the model after forgetting the selected classes. Looking at Tab. 16, following the forgetting of three classes from *Caltech101* datasets, there were 106 incorrect predictions after forgetting compared to the model’s performance before forgetting on the *OxfordFlowers* dataset. Among these, we found that in 88 instances (83.02%), the correct class in an ordered set of logits predicted by CLIP shifted by one place. This means that instead of the correct class having the highest score, it ranked second-highest after forgetting. At the same time, to be included in those 88 instances the new highest incorrect prediction of the forget model must have been the second highest class in the original model’s logits.

To explain this procedure with an example, consider a given image of a *Poodle* for which the original model predicted the classes in the following way: *Poodle, Labrador, Spaniel* ordered by logits assumed to be 15, 14.9, 12. Here, *Poodle* was the correct prediction with the highest score, as we only examined cases where the original model was correct and assessed how that changed after forgetting. After the forgetting process, the new model predicts: *Labrador, Poodle, Spaniel* with sorted scores 15.1, 14.9, 11.8. In this case, the correct prediction (*Poodle*) moved from the highest to second highest score, i.e., one step away from its original position, and the difference in scores is 0.02 (corresponding to *One-Step Avg. LogitScore* in Tab. 14). Also, the new incorrect prediction with the highest score, *Labrador*, was the second highest prediction in the original model logits, thus this example would be included in calculating the *One-Step %*.

Similarly, looking at shifts of up to two places, where the correct class ranked either second or third highest, we found that 99 cases (93.4%) moved away by a maximum of two places from the correct prediction.

For *StanfordDogs*, there were 120 incorrect labels. In 100 cases (83.33%), the correct class moved away by one place, and in 112 cases (93.33%), it shifted by a maximum of two places.

For *StanfordCars*, we took the model after forgetting on classes shown on the last row of Tab. 6. There were 124 incorrect labels. In 104 cases (83.87%), the correct class moved away by one place, and in 116 cases (93.54%), it shifted by a maximum of two places.

These results are summarized in Table 14. The  $\Delta$  *One-Step Avg. LogitScore* represents the standardized average change in logits scores between the model’s new incorrect and correct predictions. Similarly, for  $\Delta$  *Two-Step Avg. LogitScore*, considering a shift of two places.

This analysis indicates that the greater than expected drop in accuracy on the *OxfordFlowers* dataset is attributed to the model’s original uncertainty about those cases. Thus, despite our demonstrated ability to precisely target the parameters for forgetting the target class, the model’s initial uncertainty contributes to the relatively more pronounced decrease in accuracy.

Table 14. Sensitivity Analysis on OxfordFlowers dataset.

| Model        | One-Step % | $\Delta$ One-Step Avg. LogitScore | Two-Step % | $\Delta$ Two-Step Avg. LogitScore |
|--------------|------------|-----------------------------------|------------|-----------------------------------|
| StanfordDogs | 83.02      | 0.014                             | 93.4       | 0.014                             |
| StanfordCars | 83.87      | 0.015                             | 93.54      | 0.016                             |
| Caltech101   | 83.33      | 0.015                             | 93.33      | 0.017                             |

Table 15. Forgetting other examples using Lipschitz loss.

| Forgetting Data | Dataset      | Class name                                                                          | Target Class acc. |              | Other Classes acc.                |       | Target Class acc. |             | StanfordCars |       | StanfordDogs |       | Caltech101 |       | OxfordFlowers |       | Avg. Score ( $\downarrow$ ) |
|-----------------|--------------|-------------------------------------------------------------------------------------|-------------------|--------------|-----------------------------------|-------|-------------------|-------------|--------------|-------|--------------|-------|------------|-------|---------------|-------|-----------------------------|
|                 |              |                                                                                     | BF                | AF           | BF                                | AF    | Synt. train       | Real valid. | BF           | AF    | BF           | AF    | BF         | AF    | BF            | AF    |                             |
|                 |              |                                                                                     | Generated         | StanfordCars | 2012 Chevrolet Avalanche Crew Cab | 0.622 | 0.044             | 0.557       | 0.494        | 0.281 | 0.0          | -     | -          | 0.517 | 0.501         | 0.857 |                             |
| Generated       | StanfordCars | 2012 Rolls-Royce Ghost Sedan                                                        | 0.526             | 0.07         | 0.557                             | 0.557 | 0.078             | 0.15        | -            | -     | 0.520        | 0.527 | 0.857      | 0.862 | 0.66          | 0.658 | 0.04                        |
| Generated       | StanfordCars | 2009 Spyker C8 Coupe,<br>2012 Rolls-Royce Ghost Sedan,<br>2011 Ford Ranger SuperCab | 0.397             | 0.12         | 0.558                             | 0.535 | -                 | -           | -            | -     | 0.517        | 0.501 | 0.857      | 0.862 | 0.661         | 0.631 | 0.08                        |

Table 16. Forgetting multiple classes with generated data using Lipschitz loss.

| Dataset       | Classes                                                                                    | Avg. Target Classes acc. |                                    | Other Classes acc. |       | StanfordCars |       | StanfordDogs |       | Caltech101 |       | OxfordFlowers |       | Avg. Score ( $\downarrow$ ) |
|---------------|--------------------------------------------------------------------------------------------|--------------------------|------------------------------------|--------------------|-------|--------------|-------|--------------|-------|------------|-------|---------------|-------|-----------------------------|
|               |                                                                                            | BF                       | AF                                 | BF                 | AF    | BF           | AF    | BF           | AF    | BF         | AF    | BF            | AF    |                             |
|               |                                                                                            | StanfordDogs             | Pekinese,toy poodle,Scotch terrier | 0.593              | 0.09  | 0.517        | 0.507 | 0.558        | 0.547 | -          | -     | 0.857         | 0.865 |                             |
| StanfordCars  | 2009 Spyker C8 Coupe,<br>2010 Dodge Ram Pickup 3500 Crew Cab,<br>2011 Ford Ranger SuperCab | 0.397                    | 0.2                                | 0.558              | 0.519 | -            | -     | 0.517        | 0.482 | 0.857      | 0.84  | 0.661         | 0.607 | 0.16                        |
| Caltech101    | euphonium,minaret,platypus                                                                 | 0.839                    | 0.125                              | 0.857              | 0.869 | 0.558        | 0.549 | 0.517        | 0.515 | -          | -     | 0.661         | 0.633 | 0.042                       |
| OxfordFlowers | gazania,tree mallow,trumpet creeper                                                        | 0.848                    | 0.0                                | 0.661              | 0.609 | 0.558        | 0.552 | 0.517        | 0.498 | 0.857      | 0.863 | -             | -     | 0.023                       |



## E. Synthetic Images Visualization

In Fig. 4 we can see an example of a synthetic image for a class from four different datasets we tested on. These synthetic samples do not have a clear appearance of the sample class but are enough for unlearning the class.

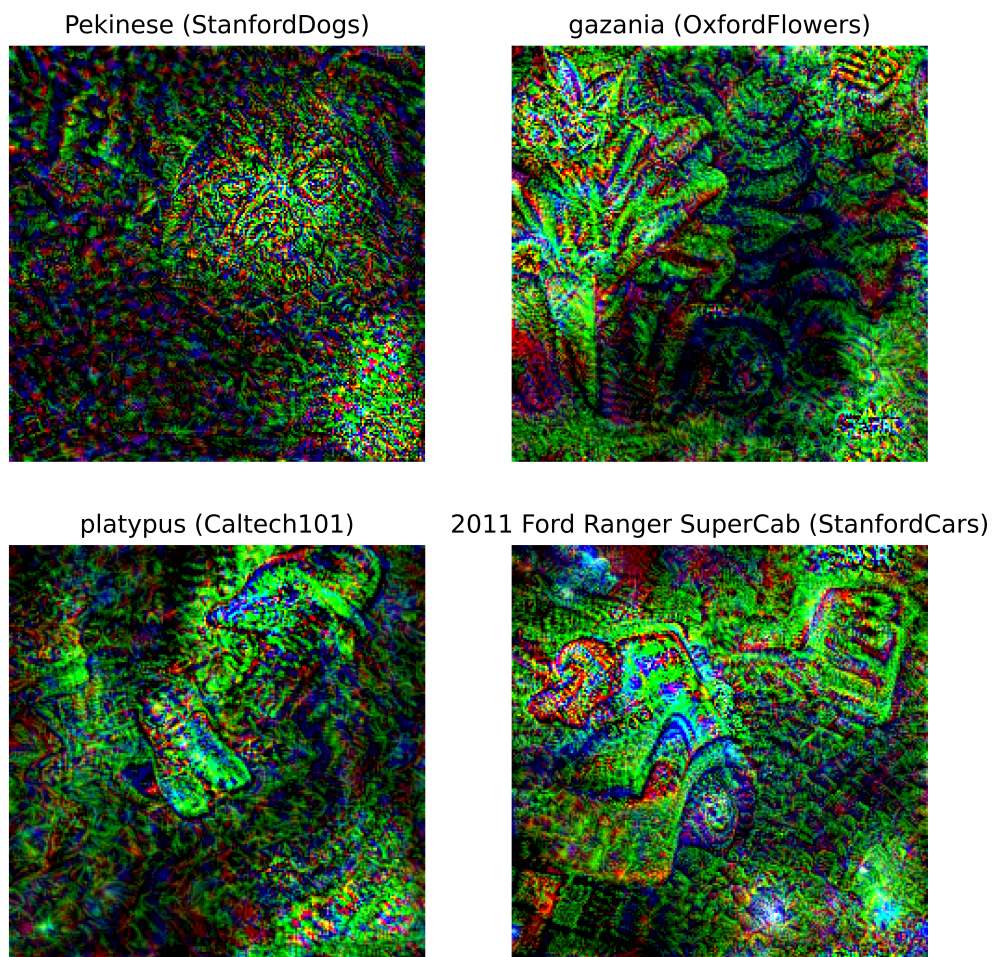

Figure 4. Synthetic images examples.

## F. ViT Results

Results for CLIP with ViT-B/16 visual encoder are included in Tab. 20. In general we observe that forgetting with ViT compared to ResNet architecture is harder and the class accuracy after forgetting, even if decreases, it often does not go to zero. This difference may be attributed to the fact that ViT learns more fine-grained representations of the input images compared to ResNet thanks to its self-attention mechanism. As a result, specific classes could be encoded in a more intricate manner within ViT’s learned representations, making them harder to unlearn without affecting other aspects of the model’s knowledge. When it comes to other methods for comparison the conclusions are similar to the ones highlighted for ResNet. Aggregated results are shown in Tab. 17

Table 17. Aggregated forgetting results with ViT-B/16 visual encoder. We compare our method (Lip) to five other methods averaging across three classes for four selected datasets. We aim to minimize the *Avg. Target Class acc. AF* while maintaining *Avg. Other Classes acc. AF* and other datasets at a similar level to that before forgetting (BF). We bold the best results comparing only among the first four methods that are zero-shot methods for a fair comparison.

| Method     | Dataset       | Forgetting Type | Avg. Target Class acc. |              | Avg. Other Classes acc. |       | Avg. StanfordCars |       | Avg. StanfordDogs |       | Avg. Caltech101 |       | Avg. OxfordFlowers |       | Avg. Score ( $\downarrow$ ) |
|------------|---------------|-----------------|------------------------|--------------|-------------------------|-------|-------------------|-------|-------------------|-------|-----------------|-------|--------------------|-------|-----------------------------|
|            |               |                 | BF                     | AF           | BF                      | AF    | BF                | AF    | BF                | AF    | BF              | AF    | BF                 | AF    |                             |
|            |               |                 | Lip                    | StanfordCars | ZS                      | 0.595 | 0.159             | 0.656 | 0.642             | -     | -               | 0.591 | 0.584              | 0.933 |                             |
| Emb        | StanfordCars  | ZS              | 0.595                  | 0.0          | 0.656                   | 0.557 | -                 | -     | 0.591             | 0.508 | 0.933           | 0.921 | 0.708              | 0.69  | 0.066                       |
| Amns       | StanfordCars  | ZS              | 0.595                  | 0.143        | 0.656                   | 0.18  | -                 | -     | 0.591             | 0.398 | 0.933           | 0.876 | 0.708              | 0.51  | 0.327                       |
| EMMN       | StanfordCars  | ZS              | 0.595                  | 0.159        | 0.656                   | 0.182 | -                 | -     | 0.591             | 0.119 | 0.933           | 0.589 | 0.708              | 0.137 | 0.592                       |
| ULip       | StanfordCars  | semi ZS         | 0.595                  | 0.032        | 0.656                   | 0.419 | -                 | -     | 0.591             | 0.59  | 0.933           | 0.93  | 0.708              | 0.711 | 0.084                       |
| AmnsRetain | StanfordCars  | not ZS          | 0.595                  | 0.0          | 0.656                   | 0.744 | -                 | -     | 0.591             | 0.476 | 0.933           | 0.887 | 0.708              | 0.554 | 0.092                       |
| Salun      | StanfordCars  | not ZS          | 0.595                  | 0.087        | 0.656                   | 0.711 | -                 | -     | 0.591             | 0.495 | 0.933           | 0.863 | 0.708              | 0.58  | 0.113                       |
| Lip        | StanfordDogs  | ZS              | 0.673                  | 0.142        | 0.591                   | 0.592 | 0.655             | 0.647 | -                 | -     | 0.933           | 0.935 | 0.708              | 0.709 | <b>0.045</b>                |
| Emb        | StanfordDogs  | ZS              | 0.673                  | 0.071        | 0.591                   | 0.518 | 0.655             | 0.632 | -                 | -     | 0.933           | 0.93  | 0.708              | 0.699 | 0.056                       |
| Amns       | StanfordDogs  | ZS              | 0.673                  | 0.219        | 0.591                   | 0.358 | 0.655             | 0.59  | -                 | -     | 0.933           | 0.901 | 0.708              | 0.572 | 0.209                       |
| EMMN       | StanfordDogs  | ZS              | 0.673                  | 0.042        | 0.591                   | 0.365 | 0.655             | 0.284 | -                 | -     | 0.933           | 0.826 | 0.708              | 0.438 | 0.301                       |
| ULip       | StanfordDogs  | semi ZS         | 0.673                  | 0.588        | 0.591                   | 0.536 | 0.655             | 0.649 | -                 | -     | 0.933           | 0.93  | 0.708              | 0.702 | 0.197                       |
| AmnsRetain | StanfordDogs  | not ZS          | 0.673                  | 0.021        | 0.591                   | 0.698 | 0.655             | 0.472 | -                 | -     | 0.933           | 0.841 | 0.708              | 0.495 | 0.142                       |
| Salun      | StanfordDogs  | not ZS          | 0.673                  | 0.043        | 0.591                   | 0.662 | 0.655             | 0.508 | -                 | -     | 0.933           | 0.835 | 0.708              | 0.609 | 0.107                       |
| Lip        | Caltech101    | ZS              | 0.971                  | 0.576        | 0.933                   | 0.935 | 0.655             | 0.652 | 0.591             | 0.594 | -               | -     | 0.708              | 0.709 | <b>0.12</b>                 |
| Emb        | Caltech101    | ZS              | 0.971                  | 0.598        | 0.933                   | 0.91  | 0.655             | 0.609 | 0.591             | 0.517 | -               | -     | 0.708              | 0.656 | 0.182                       |
| Amns       | Caltech101    | ZS              | 0.971                  | 0.846        | 0.933                   | 0.848 | 0.655             | 0.517 | 0.591             | 0.445 | -               | -     | 0.708              | 0.533 | 0.334                       |
| EMMN       | Caltech101    | ZS              | 0.971                  | 0.284        | 0.933                   | 0.813 | 0.655             | 0.352 | 0.591             | 0.302 | -               | -     | 0.708              | 0.473 | 0.341                       |
| ULip       | Caltech101    | semi ZS         | 0.971                  | 0.812        | 0.933                   | 0.916 | 0.655             | 0.65  | 0.591             | 0.584 | -               | -     | 0.708              | 0.702 | 0.177                       |
| AmnsRetain | Caltech101    | not ZS          | 0.971                  | 0.0          | 0.933                   | 0.946 | 0.655             | 0.506 | 0.591             | 0.474 | -               | -     | 0.708              | 0.544 | 0.132                       |
| Salun      | Caltech101    | not ZS          | 0.971                  | 0.0          | 0.933                   | 0.926 | 0.655             | 0.525 | 0.591             | 0.506 | -               | -     | 0.708              | 0.642 | 0.088                       |
| Lip        | OxfordFlowers | ZS              | 0.784                  | 0.078        | 0.707                   | 0.702 | 0.655             | 0.645 | 0.591             | 0.588 | 0.933           | 0.933 | -                  | -     | <b>0.026</b>                |
| Emb        | OxfordFlowers | ZS              | 0.784                  | 0.0          | 0.707                   | 0.617 | 0.655             | 0.543 | 0.591             | 0.522 | 0.933           | 0.906 | -                  | -     | 0.089                       |
| Amns       | OxfordFlowers | ZS              | 0.784                  | 0.834        | 0.707                   | 0.527 | 0.655             | 0.602 | 0.591             | 0.526 | 0.933           | 0.913 | -                  | -     | 0.307                       |
| EMMN       | OxfordFlowers | ZS              | 0.784                  | 0.02         | 0.707                   | 0.433 | 0.655             | 0.317 | 0.591             | 0.304 | 0.933           | 0.83  | -                  | -     | 0.305                       |
| ULip       | OxfordFlowers | semi ZS         | 0.784                  | 0.02         | 0.707                   | 0.529 | 0.655             | 0.64  | 0.591             | 0.554 | 0.933           | 0.913 | -                  | -     | 0.077                       |
| AmnsRetain | OxfordFlowers | not ZS          | 0.784                  | 0.0          | 0.707                   | 0.945 | 0.655             | 0.56  | 0.591             | 0.531 | 0.933           | 0.914 | -                  | -     | 0.054                       |
| Salun      | OxfordFlowers | not ZS          | 0.784                  | 0.059        | 0.707                   | 0.923 | 0.655             | 0.537 | 0.591             | 0.503 | 0.933           | 0.857 | -                  | -     | 0.097                       |

Table 18. Forgetting with real data using Lipschitz loss ViT-B/16 visual encoder.

| Dataset       | Class name                          | Target     |       | Other        |       | Target      |       | StanfordCars | StanfordDogs | Caltech101 | OxfordFlowers | Avg. Score (↓) |       |       |       |
|---------------|-------------------------------------|------------|-------|--------------|-------|-------------|-------|--------------|--------------|------------|---------------|----------------|-------|-------|-------|
|               |                                     | Class acc. |       | Classes acc. |       | Class acc.  |       |              |              |            |               |                |       |       |       |
|               |                                     | BF         | AF    | BF           | AF    | Real valid. | BF    |              |              |            |               |                | AF    | BF    | AF    |
| StanfordDogs  | Pekinese                            | 0.787      | 0.016 | 0.59         | 0.607 | 0.0         | 0.655 | 0.657        | -            | -          | 0.933         | 0.932          | 0.708 | 0.709 | 0.004 |
| StanfordDogs  | toy poodle                          | 0.607      | 0.131 | 0.591        | 0.581 | 0.022       | 0.655 | 0.64         | -            | -          | 0.933         | 0.94           | 0.708 | 0.715 | 0.051 |
| StanfordDogs  | Scotch terrier                      | 0.625      | 0.047 | 0.591        | 0.56  | 0.085       | 0.655 | 0.64         | -            | -          | 0.933         | 0.937          | 0.708 | 0.709 | 0.03  |
| StanfordCars  | 2009 Spyker C8 Coupe                | 0.429      | 0.238 | 0.656        | 0.652 | 0.176       | -     | -            | 0.591        | 0.591      | 0.933         | 0.933          | 0.708 | 0.708 | 0.112 |
| StanfordCars  | 2010 Dodge Ram Pickup 3500 Crew Cab | 0.548      | 0.143 | 0.656        | 0.637 | 0.088       | -     | -            | 0.591        | 0.598      | 0.933         | 0.938          | 0.708 | 0.713 | 0.058 |
| StanfordCars  | 2011 Ford Ranger SuperCab           | 0.81       | 0.81  | 0.654        | 0.654 | 0.794       | -     | -            | 0.591        | 0.593      | 0.933         | 0.933          | 0.708 | 0.71  | 0.224 |
| Caltech101    | euphonium                           | 1.0        | 0.0   | 0.933        | 0.935 | 0.031       | 0.655 | 0.656        | 0.591        | 0.596      | -             | -              | 0.708 | 0.707 | 0.0   |
| Caltech101    | minaret                             | 0.913      | 0.739 | 0.933        | 0.928 | 0.711       | 0.655 | 0.644        | 0.591        | 0.593      | -             | -              | 0.708 | 0.719 | 0.167 |
| Caltech101    | platypus                            | 1.0        | 0.9   | 0.933        | 0.934 | 0.647       | 0.655 | 0.656        | 0.591        | 0.599      | -             | -              | 0.708 | 0.714 | 0.18  |
| OxfordFlowers | gazania                             | 1.0        | 0.087 | 0.705        | 0.711 | 0.077       | 0.655 | 0.653        | 0.591        | 0.601      | 0.933         | 0.934          | -     | -     | 0.018 |
| OxfordFlowers | tree mallow                         | 0.765      | 0.294 | 0.707        | 0.7   | 0.172       | 0.655 | 0.652        | 0.591        | 0.601      | 0.933         | 0.941          | -     | -     | 0.08  |
| OxfordFlowers | trumpet creeper                     | 0.588      | 0.118 | 0.709        | 0.713 | 0.241       | 0.655 | 0.648        | 0.591        | 0.602      | 0.933         | 0.939          | -     | -     | 0.042 |

Table 19. Forgetting on multiple classes using Lipschitz loss ViT-B/16 visual encoder.

| Dataset       | Classes                                                                              | Avg. Target  |       | Other        |       | StanfordCars | StanfordDogs | Caltech101 | OxfordFlowers | Avg. Score (↓) |       |       |       |       |
|---------------|--------------------------------------------------------------------------------------|--------------|-------|--------------|-------|--------------|--------------|------------|---------------|----------------|-------|-------|-------|-------|
|               |                                                                                      | Classes acc. |       | Classes acc. |       |              |              |            |               |                |       |       |       |       |
|               |                                                                                      | BF           | AF    | BF           | AF    |              |              |            |               |                | BF    | AF    | BF    | AF    |
| StanfordDogs  | Pekinese, toy poodle, Scotch terrier                                                 | 0.672        | 0.251 | 0.589        | 0.584 | 0.655        | 0.644        | -          | -             | 0.933          | 0.939 | 0.708 | 0.713 | 0.08  |
| StanfordCars  | 2009 Spyker C8 Coupe, 2010 Dodge Ram Pickup 3500 Crew Cab, 2011 Ford Ranger SuperCab | 0.595        | 0.3   | 0.656        | 0.625 | -            | -            | 0.591      | 0.576         | 0.933          | 0.928 | 0.708 | 0.699 | 0.119 |
| Caltech101    | euphonium, minaret, platypus                                                         | 0.971        | 0.498 | 0.932        | 0.929 | 0.655        | 0.634        | 0.591      | 0.589         | -              | -     | 0.708 | 0.709 | 0.11  |
| OxfordFlowers | trumpet creeper, gazania, tree mallow                                                | 0.807        | 0.31  | 0.705        | 0.68  | 0.655        | 0.613        | 0.591      | 0.551         | 0.933          | 0.929 | -     | -     | 0.111 |

Table 20. Forgetting results with ViT-B/16 visual encoder. We compare our methods with five others on three classes for four selected datasets. We bold the best results comparing only among the first four methods that are zero-shot methods for a fair comparison.

| Method     | Dataset       | Class name                          | Target Class acc. |       | Other Classes acc. |       | Target Class acc. |                   | StanfordCars |       | StanfordDogs |       | Caltech101 |       | OxfordFlowers |       | Avg. Score (↓) |
|------------|---------------|-------------------------------------|-------------------|-------|--------------------|-------|-------------------|-------------------|--------------|-------|--------------|-------|------------|-------|---------------|-------|----------------|
|            |               |                                     | BF                | AF    | BF                 | AF    | Synt.             | Real train valid. | BF           | AF    | BF           | AF    | BF         | AF    | BF            | AF    |                |
|            |               |                                     |                   |       |                    |       |                   |                   |              |       |              |       |            |       |               |       |                |
| Lip        | StanfordDogs  | Pekinese                            | 0.787             | 0.377 | 0.59               | 0.601 | 0.094             | 0.273             | 0.655        | 0.656 | -            | -     | 0.933      | 0.934 | 0.708         | 0.708 | 0.096          |
| Lip        | StanfordDogs  | toy poodle                          | 0.607             | 0.033 | 0.591              | 0.593 | 0.0               | 0.0               | 0.655        | 0.639 | -            | -     | 0.933      | 0.932 | 0.708         | 0.707 | <b>0.016</b>   |
| Lip        | StanfordDogs  | Scotch terrier                      | 0.625             | 0.016 | 0.591              | 0.582 | 0.219             | 0.0               | 0.655        | 0.647 | -            | -     | 0.933      | 0.938 | 0.708         | 0.713 | <b>0.011</b>   |
| Lip        | StanfordCars  | 2009 Spyker C8 Coupe                | 0.429             | 0.262 | 0.656              | 0.639 | 0.484             | 0.222             | -            | -     | 0.591        | 0.581 | 0.933      | 0.93  | 0.708         | 0.7   | <b>0.134</b>   |
| Lip        | StanfordCars  | 2010 Dodge Ram Pickup 3500 Crew Cab | 0.548             | 0.048 | 0.656              | 0.634 | 0.062             | 0.0               | -            | -     | 0.591        | 0.58  | 0.933      | 0.933 | 0.708         | 0.708 | 0.028          |
| Lip        | StanfordCars  | 2011 Ford Ranger SuperCab           | 0.81              | 0.167 | 0.654              | 0.653 | 0.984             | 0.125             | -            | -     | 0.591        | 0.59  | 0.933      | 0.933 | 0.708         | 0.713 | <b>0.042</b>   |
| Lip        | Caltech101    | euphonium                           | 1.0               | 0.158 | 0.933              | 0.935 | 0.0               | 0.154             | 0.655        | 0.653 | 0.591        | 0.597 | -          | -     | 0.708         | 0.706 | <b>0.033</b>   |
| Lip        | Caltech101    | minaret                             | 0.913             | 0.87  | 0.933              | 0.932 | 0.031             | 1.0               | 0.655        | 0.649 | 0.591        | 0.59  | -          | -     | 0.708         | 0.709 | <b>0.187</b>   |
| Lip        | Caltech101    | platypus                            | 1.0               | 0.7   | 0.933              | 0.936 | 0.031             | 0.857             | 0.655        | 0.653 | 0.591        | 0.595 | -          | -     | 0.708         | 0.711 | <b>0.141</b>   |
| Lip        | OxfordFlowers | gazania                             | 1.0               | 0.0   | 0.705              | 0.7   | 0.297             | 0.0               | 0.655        | 0.642 | 0.591        | 0.587 | 0.933      | 0.935 | -             | -     | 0.007          |
| Lip        | OxfordFlowers | tree mallow                         | 0.765             | 0.176 | 0.707              | 0.699 | 0.172             | 0.0               | 0.655        | 0.65  | 0.591        | 0.596 | 0.933      | 0.933 | -             | -     | <b>0.05</b>    |
| Lip        | OxfordFlowers | trumpet creeper                     | 0.588             | 0.059 | 0.709              | 0.705 | 0.781             | 0.0               | 0.655        | 0.644 | 0.591        | 0.581 | 0.933      | 0.932 | -             | -     | <b>0.028</b>   |
| Emb        | StanfordDogs  | Pekinese                            | 0.787             | 0.213 | 0.59               | 0.601 | 0.031             | 0.227             | 0.655        | 0.656 | -            | -     | 0.933      | 0.934 | 0.708         | 0.708 | <b>0.054</b>   |
| Emb        | StanfordDogs  | toy poodle                          | 0.607             | 0.0   | 0.591              | 0.472 | 0.0               | 0.0               | 0.655        | 0.621 | -            | -     | 0.933      | 0.931 | 0.708         | 0.696 | 0.054          |
| Emb        | StanfordDogs  | Scotch terrier                      | 0.625             | 0.0   | 0.591              | 0.481 | 0.141             | 0.0               | 0.655        | 0.617 | -            | -     | 0.933      | 0.926 | 0.708         | 0.695 | 0.054          |
| Emb        | StanfordCars  | 2009 Spyker C8 Coupe                | 0.429             | 0.0   | 0.656              | 0.479 | 0.016             | 0.0               | -            | -     | 0.591        | 0.392 | 0.933      | 0.908 | 0.708         | 0.659 | 0.14           |
| Emb        | StanfordCars  | 2010 Dodge Ram Pickup 3500 Crew Cab | 0.548             | 0.0   | 0.656              | 0.626 | 0.078             | 0.0               | -            | -     | 0.591        | 0.59  | 0.933      | 0.934 | 0.708         | 0.713 | <b>0.01</b>    |
| Emb        | StanfordCars  | 2011 Ford Ranger SuperCab           | 0.81              | 0.0   | 0.654              | 0.565 | 0.203             | 0.0               | -            | -     | 0.591        | 0.542 | 0.933      | 0.92  | 0.708         | 0.699 | 0.049          |
| Emb        | Caltech101    | euphonium                           | 1.0               | 0.368 | 0.933              | 0.935 | 0.0               | 0.385             | 0.655        | 0.652 | 0.591        | 0.594 | -          | -     | 0.708         | 0.709 | 0.075          |
| Emb        | Caltech101    | minaret                             | 0.913             | 0.826 | 0.933              | 0.933 | 0.016             | 0.867             | 0.655        | 0.635 | 0.591        | 0.583 | -          | -     | 0.708         | 0.711 | 0.19           |
| Emb        | Caltech101    | platypus                            | 1.0               | 0.6   | 0.933              | 0.861 | 0.0               | 0.429             | 0.655        | 0.539 | 0.591        | 0.376 | -          | -     | 0.708         | 0.547 | 0.289          |
| Emb        | OxfordFlowers | gazania                             | 1.0               | 0.0   | 0.705              | 0.705 | 0.141             | 0.0               | 0.655        | 0.645 | 0.591        | 0.593 | 0.933      | 0.933 | -             | -     | <b>0.003</b>   |
| Emb        | OxfordFlowers | tree mallow                         | 0.765             | 0.0   | 0.707              | 0.577 | 0.172             | 0.0               | 0.655        | 0.58  | 0.591        | 0.501 | 0.933      | 0.903 | -             | -     | 0.097          |
| Emb        | OxfordFlowers | trumpet creeper                     | 0.588             | 0.0   | 0.709              | 0.569 | 0.0               | 0.0               | 0.655        | 0.406 | 0.591        | 0.472 | 0.933      | 0.88  | -             | -     | 0.167          |
| Amns       | StanfordDogs  | Pekinese                            | 0.787             | 0.623 | 0.59               | 0.366 | 0.031             | 0.545             | 0.655        | 0.581 | -            | -     | 0.933      | 0.896 | 0.708         | 0.609 | 0.293          |
| Amns       | StanfordDogs  | toy poodle                          | 0.607             | 0.033 | 0.591              | 0.234 | 0.0               | 0.0               | 0.655        | 0.57  | -            | -     | 0.933      | 0.899 | 0.708         | 0.482 | 0.229          |
| Amns       | StanfordDogs  | Scotch terrier                      | 0.625             | 0.0   | 0.591              | 0.473 | 0.062             | 0.042             | 0.655        | 0.618 | -            | -     | 0.933      | 0.908 | 0.708         | 0.626 | 0.08           |
| Amns       | StanfordCars  | 2009 Spyker C8 Coupe                | 0.429             | 0.0   | 0.656              | 0.058 | 0.0               | 0.0               | -            | -     | 0.591        | 0.242 | 0.933      | 0.808 | 0.708         | 0.361 | 0.425          |
| Amns       | StanfordCars  | 2010 Dodge Ram Pickup 3500 Crew Cab | 0.548             | 0.214 | 0.656              | 0.166 | 0.0               | 0.0               | -            | -     | 0.591        | 0.436 | 0.933      | 0.904 | 0.708         | 0.572 | 0.325          |
| Amns       | StanfordCars  | 2011 Ford Ranger SuperCab           | 0.81              | 0.214 | 0.654              | 0.315 | 0.094             | 0.25              | -            | -     | 0.591        | 0.516 | 0.933      | 0.916 | 0.708         | 0.596 | 0.217          |
| Amns       | Caltech101    | euphonium                           | 1.0               | 1.0   | 0.933              | 0.901 | 0.406             | 0.923             | 0.655        | 0.648 | 0.591        | 0.57  | -          | -     | 0.708         | 0.639 | 0.236          |
| Amns       | Caltech101    | minaret                             | 0.913             | 0.739 | 0.933              | 0.774 | 0.094             | 0.6               | 0.655        | 0.336 | 0.591        | 0.257 | -          | -     | 0.708         | 0.366 | 0.503          |
| Amns       | Caltech101    | platypus                            | 1.0               | 0.8   | 0.933              | 0.868 | 0.078             | 0.714             | 0.655        | 0.566 | 0.591        | 0.507 | -          | -     | 0.708         | 0.594 | 0.262          |
| Amns       | OxfordFlowers | gazania                             | 1.0               | 0.913 | 0.705              | 0.518 | 0.062             | 0.875             | 0.655        | 0.586 | 0.591        | 0.514 | 0.933      | 0.908 | -             | -     | 0.288          |
| Amns       | OxfordFlowers | tree mallow                         | 0.765             | 0.824 | 0.707              | 0.484 | 0.094             | 0.75              | 0.655        | 0.593 | 0.591        | 0.513 | 0.933      | 0.931 | -             | -     | 0.329          |
| Amns       | OxfordFlowers | trumpet creeper                     | 0.588             | 0.765 | 0.709              | 0.578 | 0.094             | 0.75              | 0.655        | 0.627 | 0.591        | 0.55  | 0.933      | 0.92  | -             | -     | 0.322          |
| EMMN       | StanfordDogs  | Pekinese                            | 0.787             | 0.0   | 0.59               | 0.376 | -                 | -                 | 0.655        | 0.278 | -            | -     | 0.933      | 0.828 | 0.708         | 0.432 | 0.288          |
| EMMN       | StanfordDogs  | toy poodle                          | 0.607             | 0.0   | 0.591              | 0.373 | -                 | -                 | 0.655        | 0.308 | -            | -     | 0.933      | 0.836 | 0.708         | 0.446 | 0.275          |
| EMMN       | StanfordDogs  | Scotch terrier                      | 0.625             | 0.125 | 0.591              | 0.347 | -                 | -                 | 0.655        | 0.265 | -            | -     | 0.933      | 0.813 | 0.708         | 0.436 | 0.344          |
| EMMN       | StanfordCars  | 2009 Spyker C8 Coupe                | 0.429             | 0.0   | 0.656              | 0.188 | -                 | -                 | -            | -     | 0.591        | 0.116 | 0.933      | 0.614 | 0.708         | 0.148 | 0.53           |
| EMMN       | StanfordCars  | 2010 Dodge Ram Pickup 3500 Crew Cab | 0.548             | 0.476 | 0.656              | 0.184 | -                 | -                 | -            | -     | 0.591        | 0.13  | 0.933      | 0.56  | 0.708         | 0.126 | 0.718          |
| EMMN       | StanfordCars  | 2011 Ford Ranger SuperCab           | 0.81              | 0.0   | 0.654              | 0.175 | -                 | -                 | -            | -     | 0.591        | 0.111 | 0.933      | 0.594 | 0.708         | 0.136 | 0.543          |
| EMMN       | Caltech101    | euphonium                           | 1.0               | 0.105 | 0.933              | 0.783 | -                 | -                 | 0.655        | 0.352 | 0.591        | 0.297 | -          | -     | 0.708         | 0.45  | 0.318          |
| EMMN       | Caltech101    | minaret                             | 0.913             | 0.348 | 0.933              | 0.817 | -                 | -                 | 0.655        | 0.36  | 0.591        | 0.315 | -          | -     | 0.708         | 0.485 | 0.347          |
| EMMN       | Caltech101    | platypus                            | 1.0               | 0.4   | 0.933              | 0.838 | -                 | -                 | 0.655        | 0.345 | 0.591        | 0.294 | -          | -     | 0.708         | 0.484 | 0.359          |
| EMMN       | OxfordFlowers | gazania                             | 1.0               | 0.0   | 0.705              | 0.44  | -                 | -                 | 0.655        | 0.308 | 0.591        | 0.312 | 0.933      | 0.832 | -             | -     | 0.297          |
| EMMN       | OxfordFlowers | tree mallow                         | 0.765             | 0.0   | 0.707              | 0.445 | -                 | -                 | 0.655        | 0.33  | 0.591        | 0.288 | 0.933      | 0.829 | -             | -     | 0.298          |
| EMMN       | OxfordFlowers | trumpet creeper                     | 0.588             | 0.059 | 0.709              | 0.413 | -                 | -                 | 0.655        | 0.312 | 0.591        | 0.31  | 0.933      | 0.828 | -             | -     | 0.326          |
| AmnsRetain | StanfordDogs  | Pekinese                            | 0.787             | 0.0   | 0.59               | 0.706 | -                 | -                 | 0.655        | 0.473 | -            | -     | 0.933      | 0.829 | 0.708         | 0.49  | 0.139          |
| AmnsRetain | StanfordDogs  | toy poodle                          | 0.607             | 0.0   | 0.591              | 0.709 | -                 | -                 | 0.655        | 0.475 | -            | -     | 0.933      | 0.847 | 0.708         | 0.507 | 0.13           |
| AmnsRetain | StanfordDogs  | Scotch terrier                      | 0.625             | 0.062 | 0.591              | 0.679 | -                 | -                 | 0.655        | 0.468 | -            | -     | 0.933      | 0.848 | 0.708         | 0.488 | 0.158          |
| AmnsRetain | StanfordCars  | 2009 Spyker C8 Coupe                | 0.429             | 0.0   | 0.656              | 0.768 | -                 | -                 | -            | -     | 0.591        | 0.475 | 0.933      | 0.88  | 0.708         | 0.573 | 0.089          |
| AmnsRetain | StanfordCars  | 2010 Dodge Ram Pickup 3500 Crew Cab | 0.548             | 0.0   | 0.656              | 0.742 | -                 | -                 | -            | -     | 0.591        | 0.494 | 0.933      | 0.89  | 0.708         | 0.549 | 0.087          |
| AmnsRetain | StanfordCars  | 2011 Ford Ranger SuperCab           | 0.81              | 0.0   | 0.654              | 0.721 | -                 | -                 | -            | -     | 0.591        | 0.46  | 0.933      | 0.891 | 0.708         | 0.539 | 0.101          |
| AmnsRetain | Caltech101    | euphonium                           | 1.0               | 0.0   | 0.933              | 0.945 | -                 | -                 | 0.655        | 0.493 | 0.591        | 0.46  | -          | -     | 0.708         | 0.556 | 0.137          |
| AmnsRetain | Caltech101    | minaret                             | 0.913             | 0.0   | 0.933              | 0.938 | -                 | -                 | 0.655        | 0.494 | 0.591        | 0.468 | -          | -     | 0.708         | 0.532 | 0.14           |
| AmnsRetain | Caltech101    | platypus                            | 1.0               | 0.0   | 0.933              | 0.956 | -                 | -                 | 0.655        | 0.53  | 0.591        | 0.493 | -          | -     | 0.708         | 0.543 | 0.118          |
| AmnsRetain | OxfordFlowers | gazania                             | 1.0               | 0.0   | 0.705              | 0.944 | -                 | -                 | 0.655        | 0.563 | 0.591        | 0.522 | 0.933      | 0.916 | -             | -     | 0.055          |
| AmnsRetain | OxfordFlowers | tree mallow                         | 0.765             | 0.0   | 0.707              | 0.934 | -                 | -                 | 0.655        | 0.558 | 0.591        | 0.528 | 0.933      | 0.913 | -             | -     | 0.055          |
| AmnsRetain | OxfordFlowers | trumpet creeper                     | 0.588             | 0.0   | 0.709              | 0.956 | -                 | -                 | 0.655        | 0.558 | 0.591        | 0.542 | 0.933      | 0.913 | -             | -     | 0.051          |
| Salun      | StanfordDogs  | Pekinese                            | 0.787             | 0.049 | 0.59               | 0.669 | -                 | -                 | 0.655        | 0.521 | -            | -     | 0.933      | 0.842 | 0.708         | 0.605 | 0.102          |
| Salun      | StanfordDogs  | toy poodle                          | 0.607             | 0.066 | 0.591              | 0.654 | -                 | -                 | 0.655        | 0.508 | -            | -     | 0.933      | 0.838 | 0.708         | 0.627 | 0.11           |
| Salun      | StanfordDogs  | Scotch terrier                      | 0.625             | 0.016 | 0.591              | 0.663 | -                 | -                 | 0.655        | 0.495 | -            | -     | 0.933      | 0.824 | 0.708         | 0.594 | 0.109          |
| Salun      | StanfordCars  | 2009 Spyker C8 Coupe                | 0.429             | 0.167 | 0.656              | 0.718 | -                 | -                 | -            | -     | 0.591        | 0.5   | 0.933      | 0.869 | 0.708         | 0.583 | 0.157          |
| Salun      | StanfordCars  | 2010 Dodge Ram Pickup 3500 Crew Cab | 0.548             | 0.048 | 0.656              | 0.709 | -                 | -                 | -            | -     | 0.591        | 0.497 | 0.933      | 0.855 | 0.708         |       |                |

## G. Unlearning Identities

In line with our motivation of the right to be forgotten, we assess whether our unlearning method is able to forget faces. For this experiment we choose PinsFaces [1] dataset that contains 105 celebrity faces. As we can see in Tabs. 21 and 22 our method is also valid to unlearn faces.

Table 21. Unlearning Faces Full Results with RN50.

| Dataset   | Class name  | Target     |       | Other        |       | StanfordCars |       | StanfordDogs |       | Caltech101 |       | OxfordFlowers |       | Avg. Score (↓) |
|-----------|-------------|------------|-------|--------------|-------|--------------|-------|--------------|-------|------------|-------|---------------|-------|----------------|
|           |             | Class acc. |       | Classes acc. |       |              |       |              |       |            |       |               |       |                |
|           |             | BF         | AF    | BF           | AF    | BF           | AF    | BF           | AF    | BF         | AF    | BF            | AF    |                |
| PinsFaces | Gal Gadot   | 0.707      | 0.03  | 0.822        | 0.8   | 0.558        | 0.55  | 0.517        | 0.503 | 0.857      | 0.863 | 0.661         | 0.642 | 0.029          |
| PinsFaces | Henry Cavil | 0.866      | 0.062 | 0.82         | 0.781 | 0.558        | 0.545 | 0.517        | 0.492 | 0.857      | 0.857 | 0.661         | 0.623 | 0.049          |
| PinsFaces | Amanda Crew | 0.828      | 0.069 | 0.821        | 0.815 | 0.558        | 0.557 | 0.517        | 0.511 | 0.857      | 0.861 | 0.661         | 0.649 | 0.024          |

Table 22. Unlearning Faces Full Results with ViT-B/16.

| Dataset   | Class name  | Target     |       | Other        |       | StanfordCars |       | StanfordDogs |       | Caltech101 |       | OxfordFlowers |       | Avg. Score (↓) |
|-----------|-------------|------------|-------|--------------|-------|--------------|-------|--------------|-------|------------|-------|---------------|-------|----------------|
|           |             | Class acc. |       | Classes acc. |       |              |       |              |       |            |       |               |       |                |
|           |             | BF         | AF    | BF           | AF    | BF           | AF    | BF           | AF    | BF         | AF    | BF            | AF    |                |
| PinsFaces | Gal Gadot   | 0.879      | 0.091 | 0.908        | 0.908 | 0.655        | 0.65  | 0.591        | 0.589 | 0.933      | 0.932 | 0.708         | 0.708 | 0.023          |
| PinsFaces | Henry Cavil | 0.959      | 0.216 | 0.907        | 0.903 | 0.655        | 0.646 | 0.591        | 0.585 | 0.933      | 0.932 | 0.708         | 0.695 | 0.055          |
| PinsFaces | Amanda Crew | 1.0        | 0.0   | 0.907        | 0.91  | 0.655        | 0.656 | 0.591        | 0.594 | 0.933      | 0.933 | 0.708         | 0.71  | 0.0            |

## H. Forgetting Algorithm

---

**Algorithm 1** CLIP forgetting

---

**Require:** CLIP image and text encoders:  $f_\theta, f_\phi$   
**Require:** Textual class to forget:  $x_{text}$ , Learning rate:  $\alpha$ ,  
**Require:** Initial number of visual and textual layers to update:  $InitV_{up}, InitT_{up}$   
**Require:** Increase steps sigma:  $s$ , visual layers:  $v$ , textual layers:  $t$   
**Require:** Number of perturbations:  $N$ , Initial Gaussian perturbation:  $\sigma$   
**Require:** Accuracy stopping threshold:  $GoalAcc$ , Total increase steps:  $I$   
**Require:** Optimizer:  $optim(\theta, \phi, lr = \alpha)$   
▷ Function that generates synthetic training samples by gradient ascent as in Eq. 5  
 $X \leftarrow SyntheticImagesGen(x_{text})$   
**for**  $n$  in  $range(I)$  **do**  
  **for**  $x_{img}$  in  $X$  **do**  
     $\ell = 0$   
    **for**  $i$  in  $range(N)$  **do**  
      Sample  $\epsilon \sim \mathcal{N}(0, \sigma^2)$   
       $x'_{img} = x_{img} + \epsilon$   
       $k = \frac{\|f_\theta(x_{img}) - f_\theta(x'_{img})\|_2 + \|f_\phi(x_{text}) - f_\phi(x'_{img})\|_2}{\|\epsilon\|_2}$   
       $\ell = \ell + k$   
    **end for**  
     $\ell = \ell / N$   
    ▷ Update  $InitV_{up}$  and  $InitT_{up}$  most important layers in visual and textual branch respectively  
     $\theta, \phi \leftarrow SelectiveUpdate(optim\{\Delta_{\theta, \phi}\ell\}, InitV_{up}, InitT_{up})$   
     $Acc \leftarrow EvalAcc(X)$                    ▷ Accuracy on synthetic training samples  
    **if**  $Acc < GoalAcc$  **then**  
      **return**  $\theta, \phi$   
    **else**  
      ▷ Increase parameters to reduce more aggressively the accuracy on synthetic samples  
       $InitV_{up} \leftarrow InitV_{up} + v$   
       $InitT_{up} \leftarrow InitT_{up} + t$   
       $\sigma \leftarrow \sigma + s$   
    **end if**  
  **end for**  
**end for**  
**return**  $\theta, \phi$ 

---

## I. Verification of Forgetting Success and Data Generation Threshold

**Data Generation Threshold** We observe that generating samples classified as the target class alone is not sufficient for effective forgetting. To achieve successful forgetting, the generated samples must exhibit a high probability of belonging to the forget class, otherwise the forgetting process might fail. Empirically, we find that selecting a threshold around 0.7 works well for ResNet50 visual encoder and around 0.9 for ViT-B/16 visual encoder, but sometimes more tuning of the threshold is required.

**Verification of Forgetting Success** The accuracy achieved on synthetic forget data should serve as a measure of how effectively the model has forgotten a class. We find that for this indicator to be consistent the probability of the predicted class on synthetic samples need to be close to the probability of the real samples, otherwise there might be some discrepancy. For example, in Tab. 23 in the 1st row *2009 Bentley Arnage Sedan* class maintains a high accuracy on *Synth. train* data despite *Target Class acc. AF* dropping to 5%. Conversely, in the 2nd row we observe that for *revolver* class the accuracy on *Synt. train* subset is low, yet forgetting was not successful as indicated by the true validation accuracy *Target Class acc. AF Real valid.*. It turns out that for *revolver* class the probability of the generated samples is too low while for *2009 Bentley Arnage Sedan* is too high. In most cases, we adopted a threshold of 0.7 in the standard setting. Thus, by generating synthetic samples with class predicted probability closer to that of real samples we reduce the discrepancy as demonstrated in the last two rows of Tab.23. Note that generating higher probability synthetic samples compared to probability of real samples would still generally suffice to forget the class but not to verify the forgetting success. A simple alternative is to rely on a small real validation subset of the class to forget or if available, stored past probabilities of the class prediction. This verification can be conducted by a user if they are unwilling to share their data with the company.

Table 23. Forgetting verification discrepancy examples.

| Discrepancy    | Dataset      | Class name                | Target     |       | Other        |       | Target      |             | StanfordCars |       | StanfordDogs |       | Caltech101 |       | OxfordFlowers |       |
|----------------|--------------|---------------------------|------------|-------|--------------|-------|-------------|-------------|--------------|-------|--------------|-------|------------|-------|---------------|-------|
|                |              |                           | Class acc. |       | Classes acc. |       | Class acc.  |             |              |       |              |       |            |       |               |       |
|                |              |                           | BF         | AF    | BF           | AF    | Synt. train | Real valid. | BF           | AF    | BF           | AF    | BF         | AF    | BF            | AF    |
| Discrepancy    | Caltech101   | revolver                  | 0.96       | 0.92  | 0.856        | 0.862 | 0.016       | 0.875       | 0.558        | 0.552 | 0.517        | 0.507 | -          | -     | 0.661         | 0.632 |
| Discrepancy    | StanfordCars | 2009 Bentley Arnage Sedan | 0.692      | 0.051 | 0.557        | 0.538 | 0.922       | 0.0         | -            | -     | 0.517        | 0.527 | 0.857      | 0.875 | 0.661         | 0.644 |
| No Discrepancy | Caltech101   | revolver                  | 0.96       | 0.16  | 0.856        | 0.855 | 0.016       | 0.0         | 0.558        | 0.524 | 0.517        | 0.48  | -          | -     | 0.661         | 0.604 |
| No Discrepancy | StanfordCars | 2009 Bentley Arnage Sedan | 0.692      | 0.026 | 0.557        | 0.543 | 0.031       | 0.0         | -            | -     | 0.517        | 0.511 | 0.857      | 0.852 | 0.661         | 0.655 |

## J. Additional Tasks

In the main paper, among the additional tasks we tested the image-image retrieval on the model after forgetting. We surprisingly found that even after forgetting the model is still able to retrieve images of the class it has forgotten starting from an input image. We speculated that in image retrieval, the model can still identify similar features and shapes of objects without actually recognizing or knowing the specific class they belong to. To confirm our hypothesis we conduct image-image retrieval on the **original** CLIP model on classes it predicts with **zero classification accuracy**. The results that confirm our hypothesis are shown in Tab. 24.

Table 24. Image retrieval from image input results on classes with zero classification accuracy.

| Model Type    | Class                                      | Classification Accuracy | Precision@1 | Precision@5 | Precision@10 |
|---------------|--------------------------------------------|-------------------------|-------------|-------------|--------------|
| CLIP original | Appenzeller (StanfordDogs)                 | 0                       | 1.0         | 0.4         | 0.2          |
| CLIP original | Pembroke (StanfordDogs)                    | 0                       | 1.0         | 0.6         | 0.4          |
| CLIP original | Cardigan (StanfordDogs)                    | 0                       | 0.0         | 0.2         | 0.2          |
| CLIP original | 2010 Chevrolet HHR SS (StanfordCars)       | 0                       | 1.0         | 0.4         | 0.4          |
| CLIP original | 2009 HUMMER H2 SUT Crew Cab (StanfordCars) | 0                       | 1.0         | 0.6         | 0.7          |
| CLIP original | english marigold (OxfordFlowers)           | 0                       | 1.0         | 0.8         | 0.6          |
| CLIP original | colt's foot (OxfordFlowers)                | 0                       | 1.0         | 0.8         | 0.7          |
| CLIP original | cape flower (OxfordFlowers)                | 0                       | 1.0         | 1.0         | 1.0          |



## J.1. Full results

Table 25. Image retrieval from text input results showing precision@k for k of 1, 5 and 10 using ViT-B/16 model

| Model Type         | Class                               | Precision@1 | Precision@5 | Precision@10 |
|--------------------|-------------------------------------|-------------|-------------|--------------|
| CLIP original      | Scotch terrier                      | 0.0         | 0.0         | 0.1          |
| CLIP original      | toy poodle                          | 1.0         | 0.8         | 0.7          |
| CLIP original      | Pekinese                            | 1.0         | 0.4         | 0.5          |
| CLIP original      | 2009 Spyker C8 Coupe                | 1.0         | 0.8         | 0.8          |
| CLIP original      | 2010 Dodge Ram Pickup 3500 Crew Cab | 1.0         | 0.6         | 0.5          |
| CLIP original      | 2011 Ford Ranger SuperCab           | 1.0         | 0.8         | 0.5          |
| CLIP original      | euphonium                           | 1.0         | 1.0         | 1.0          |
| CLIP original      | minaret                             | 1.0         | 1.0         | 1.0          |
| CLIP original      | platypus                            | 1.0         | 1.0         | 0.9          |
| CLIP original      | gazania                             | 1.0         | 1.0         | 1.0          |
| CLIP original      | tree mallow                         | 0.0         | 0.4         | 0.4          |
| CLIP original      | trumpet creeper                     | 1.0         | 0.8         | 0.6          |
| CLIP original Mean | -                                   | 0.833       | 0.717       | 0.667        |
| CLIP forget        | Scotch terrier                      | 0.0         | 0.4         | 0.4          |
| CLIP forget        | toy poodle                          | 0.0         | 0.0         | 0.1          |
| CLIP forget        | Pekinese                            | 0.0         | 0.0         | 0.2          |
| CLIP forget        | 2009 Spyker C8 Coupe                | 1.0         | 0.8         | 0.8          |
| CLIP forget        | 2010 Dodge Ram Pickup 3500 Crew Cab | 0.0         | 0.0         | 0.1          |
| CLIP forget        | 2011 Ford Ranger SuperCab           | 1.0         | 0.6         | 0.4          |
| CLIP forget        | euphonium                           | 1.0         | 1.0         | 0.6          |
| CLIP forget        | minaret                             | 1.0         | 1.0         | 0.9          |
| CLIP forget        | platypus                            | 1.0         | 1.0         | 0.5          |
| CLIP forget        | gazania                             | 1.0         | 0.2         | 0.4          |
| CLIP forget        | tree mallow                         | 0.0         | 0.0         | 0.2          |
| CLIP forget        | trumpet creeper                     | 0.0         | 0.2         | 0.2          |
| CLIP forget Mean   | -                                   | 0.5         | 0.433       | 0.4          |

Table 26. Image retrieval from image input results showing precision@k for k of 1, 5 and 10 using ViT-B/16 model

| Model Type         | Class                               | Precision@1 | Precision@5 | Precision@10 |
|--------------------|-------------------------------------|-------------|-------------|--------------|
| CLIP original      | Scotch terrier                      | 0.0         | 0.2         | 0.3          |
| CLIP original      | toy poodle                          | 1.0         | 0.4         | 0.5          |
| CLIP original      | Pekinese                            | 0.0         | 0.0         | 0.0          |
| CLIP original      | 2009 Spyker C8 Coupe                | 1.0         | 0.4         | 0.3          |
| CLIP original      | 2010 Dodge Ram Pickup 3500 Crew Cab | 0.0         | 0.0         | 0.1          |
| CLIP original      | 2011 Ford Ranger SuperCab           | 0.0         | 0.2         | 0.4          |
| CLIP original      | euphonium                           | 1.0         | 0.8         | 0.9          |
| CLIP original      | minaret                             | 1.0         | 1.0         | 1.0          |
| CLIP original      | platypus                            | 1.0         | 0.6         | 0.5          |
| CLIP original      | gazania                             | 1.0         | 1.0         | 0.7          |
| CLIP original      | tree mallow                         | 1.0         | 1.0         | 0.6          |
| CLIP original      | trumpet creeper                     | 1.0         | 1.0         | 0.7          |
| CLIP original Mean | -                                   | 0.667       | 0.55        | 0.5          |
| CLIP forget        | Scotch terrier                      | 0.0         | 0.2         | 0.3          |
| CLIP forget        | toy poodle                          | 1.0         | 0.4         | 0.5          |
| CLIP forget        | Pekinese                            | 0.0         | 0.0         | 0.0          |
| CLIP forget        | 2009 Spyker C8 Coupe                | 1.0         | 0.4         | 0.2          |
| CLIP forget        | 2010 Dodge Ram Pickup 3500 Crew Cab | 0.0         | 0.0         | 0.1          |
| CLIP forget        | 2011 Ford Ranger SuperCab           | 0.0         | 0.4         | 0.3          |
| CLIP forget        | euphonium                           | 1.0         | 0.8         | 0.9          |
| CLIP forget        | minaret                             | 1.0         | 1.0         | 0.9          |
| CLIP forget        | platypus                            | 1.0         | 0.6         | 0.5          |
| CLIP forget        | gazania                             | 1.0         | 1.0         | 0.7          |
| CLIP forget        | tree mallow                         | 1.0         | 1.0         | 0.7          |
| CLIP forget        | trumpet creeper                     | 1.0         | 1.0         | 0.7          |
| CLIP forget Mean   | -                                   | 0.667       | 0.567       | 0.483        |

Table 27. Image retrieval from text input results showing precision@k for k of 1, 5 and 10 using RN50 model

| Model Type         | Class                               | Precision@1 | Precision@5 | Precision@10 |
|--------------------|-------------------------------------|-------------|-------------|--------------|
| CLIP original      | Scotch terrier                      | 1.0         | 0.2         | 0.2          |
| CLIP original      | toy poodle                          | 1.0         | 0.6         | 0.5          |
| CLIP original      | Pekinese                            | 1.0         | 0.8         | 0.6          |
| CLIP original      | 2009 Spyker C8 Coupe                | 1.0         | 0.6         | 0.5          |
| CLIP original      | 2010 Dodge Ram Pickup 3500 Crew Cab | 1.0         | 0.2         | 0.2          |
| CLIP original      | 2011 Ford Ranger SuperCab           | 0.0         | 0.2         | 0.2          |
| CLIP original      | euphonium                           | 1.0         | 1.0         | 1.0          |
| CLIP original      | minaret                             | 1.0         | 1.0         | 1.0          |
| CLIP original      | platypus                            | 1.0         | 1.0         | 0.6          |
| CLIP original      | gazania                             | 1.0         | 1.0         | 1.0          |
| CLIP original      | tree mallow                         | 0.0         | 0.8         | 0.7          |
| CLIP original      | trumpet creeper                     | 1.0         | 0.8         | 0.5          |
| CLIP original Mean | -                                   | 0.833       | 0.683       | 0.583        |
| CLIP forget        | Scotch terrier                      | 0.0         | 0.0         | 0.0          |
| CLIP forget        | toy poodle                          | 1.0         | 0.2         | 0.1          |
| CLIP forget        | Pekinese                            | 0.0         | 0.0         | 0.0          |
| CLIP forget        | 2009 Spyker C8 Coupe                | 0.0         | 0.8         | 0.5          |
| CLIP forget        | 2010 Dodge Ram Pickup 3500 Crew Cab | 0.0         | 0.2         | 0.3          |
| CLIP forget        | 2011 Ford Ranger SuperCab           | 0.0         | 0.0         | 0.0          |
| CLIP forget        | euphonium                           | 0.0         | 0.8         | 0.8          |
| CLIP forget        | minaret                             | 0.0         | 0.4         | 0.2          |
| CLIP forget        | platypus                            | 0.0         | 0.2         | 0.2          |
| CLIP forget        | gazania                             | 0.0         | 0.0         | 0.0          |
| CLIP forget        | tree mallow                         | 0.0         | 0.2         | 0.2          |
| CLIP forget        | trumpet creeper                     | 0.0         | 0.0         | 0.0          |
| CLIP forget Mean   | -                                   | 0.08        | 0.23        | 0.191        |

Table 28. Image retrieval from image input results showing precision@k for k of 1, 5 and 10 using RN50 model

| Model Type         | Class                               | Precision@1 | Precision@5 | Precision@10 |
|--------------------|-------------------------------------|-------------|-------------|--------------|
| CLIP original      | Scotch terrier                      | 0.0         | 0.0         | 0.0          |
| CLIP original      | toy poodle                          | 0.0         | 0.0         | 0.1          |
| CLIP original      | Pekinese                            | 0.0         | 0.0         | 0.0          |
| CLIP original      | 2009 Spyker C8 Coupe                | 1.0         | 0.4         | 0.3          |
| CLIP original      | 2010 Dodge Ram Pickup 3500 Crew Cab | 0.0         | 0.0         | 0.0          |
| CLIP original      | 2011 Ford Ranger SuperCab           | 0.0         | 0.2         | 0.3          |
| CLIP original      | euphonium                           | 0.0         | 0.4         | 0.2          |
| CLIP original      | minaret                             | 1.0         | 0.8         | 0.6          |
| CLIP original      | platypus                            | 0.0         | 0.2         | 0.2          |
| CLIP original      | gazania                             | 1.0         | 0.8         | 0.6          |
| CLIP original      | tree mallow                         | 1.0         | 0.8         | 0.8          |
| CLIP original      | trumpet creeper                     | 1.0         | 0.8         | 0.7          |
| CLIP original Mean | -                                   | 0.417       | 0.367       | 0.317        |
| CLIP forget        | Scotch terrier                      | 0.0         | 0.0         | 0.0          |
| CLIP forget        | toy poodle                          | 0.0         | 0.0         | 0.1          |
| CLIP forget        | Pekinese                            | 0.0         | 0.0         | 0.0          |
| CLIP forget        | 2009 Spyker C8 Coupe                | 1.0         | 0.4         | 0.3          |
| CLIP forget        | 2010 Dodge Ram Pickup 3500 Crew Cab | 0.0         | 0.0         | 0.1          |
| CLIP forget        | 2011 Ford Ranger SuperCab           | 0.0         | 0.2         | 0.3          |
| CLIP forget        | euphonium                           | 0.0         | 0.4         | 0.2          |
| CLIP forget        | minaret                             | 0.0         | 0.8         | 0.6          |
| CLIP forget        | platypus                            | 0.0         | 0.2         | 0.2          |
| CLIP forget        | gazania                             | 1.0         | 0.8         | 0.6          |
| CLIP forget        | tree mallow                         | 1.0         | 0.8         | 0.8          |
| CLIP forget        | trumpet creeper                     | 1.0         | 0.8         | 0.7          |
| CLIP forget Mean   | -                                   | 0.333       | 0.367       | 0.325        |

## K. Additional Figures and Implementation Details

**Implementation Details** For CLIP with ResNet50 visual encoder, we observed that allowing all parameters in the vision encoder to be chosen for update during the forgetting process results in poor performance on other classes. Therefore, we restrict parameter updates to the attention layers in the RN50 vision encoder while all parameters in the text encoder are eligible for the update selection. For the ViT model all the parameters are allowed to vary. Fig. 5 illustrates the top 25 most frequently updated layers of the RN50 model. We generate 64 synthetic samples and stop the forgetting process when their accuracy goes below 0.1. We use Adam optimizer with learning rate of  $5e-05$ , weight decay of 0.2 and betas parameters of 0.9 and 0.98. We set the number of perturbed samples  $N$  to 25. Initial  $\sigma$  is 0.1 increasing to 2. Initially, layers we allow to vary are 5 for both visual and textual encoders and increasing to 8 and 20 respectively if we need more forgetting according to the remaining synthetic samples accuracy. All the experiments are run on a single NVIDIA GeForce RTX 3090 with 24GB of memory.

**Additional Figures** In the vision encoder, the weights of the values, queries, and output projections are updated most frequently, whereas in the text encoder the MLP output projection weights are updated most often.

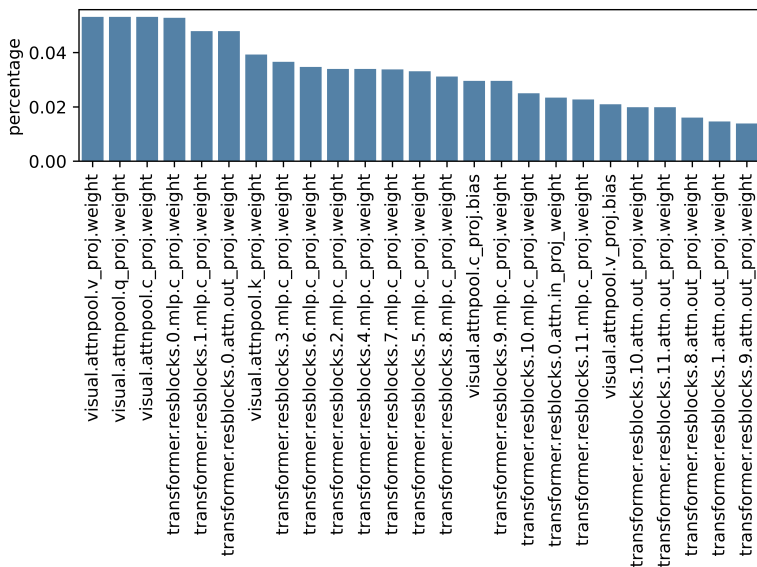

Figure 5. **Selected layers for forgetting.** The figure shows the top 25 most frequent updated layers during forgetting process across selected classes and datasets.
